# Supplementary material for: Activin receptor-like kinase5 inhibition suppresses mouse melanoma by ubiquitin degradation of Smad4, thereby derepressing eomesodermin in cytotoxic T lymphocytes
Source: PubMed Central journal article supplement (PMC3840488; doi:10.1002/emmm.201302524), 2013-10-11

Figure 2G

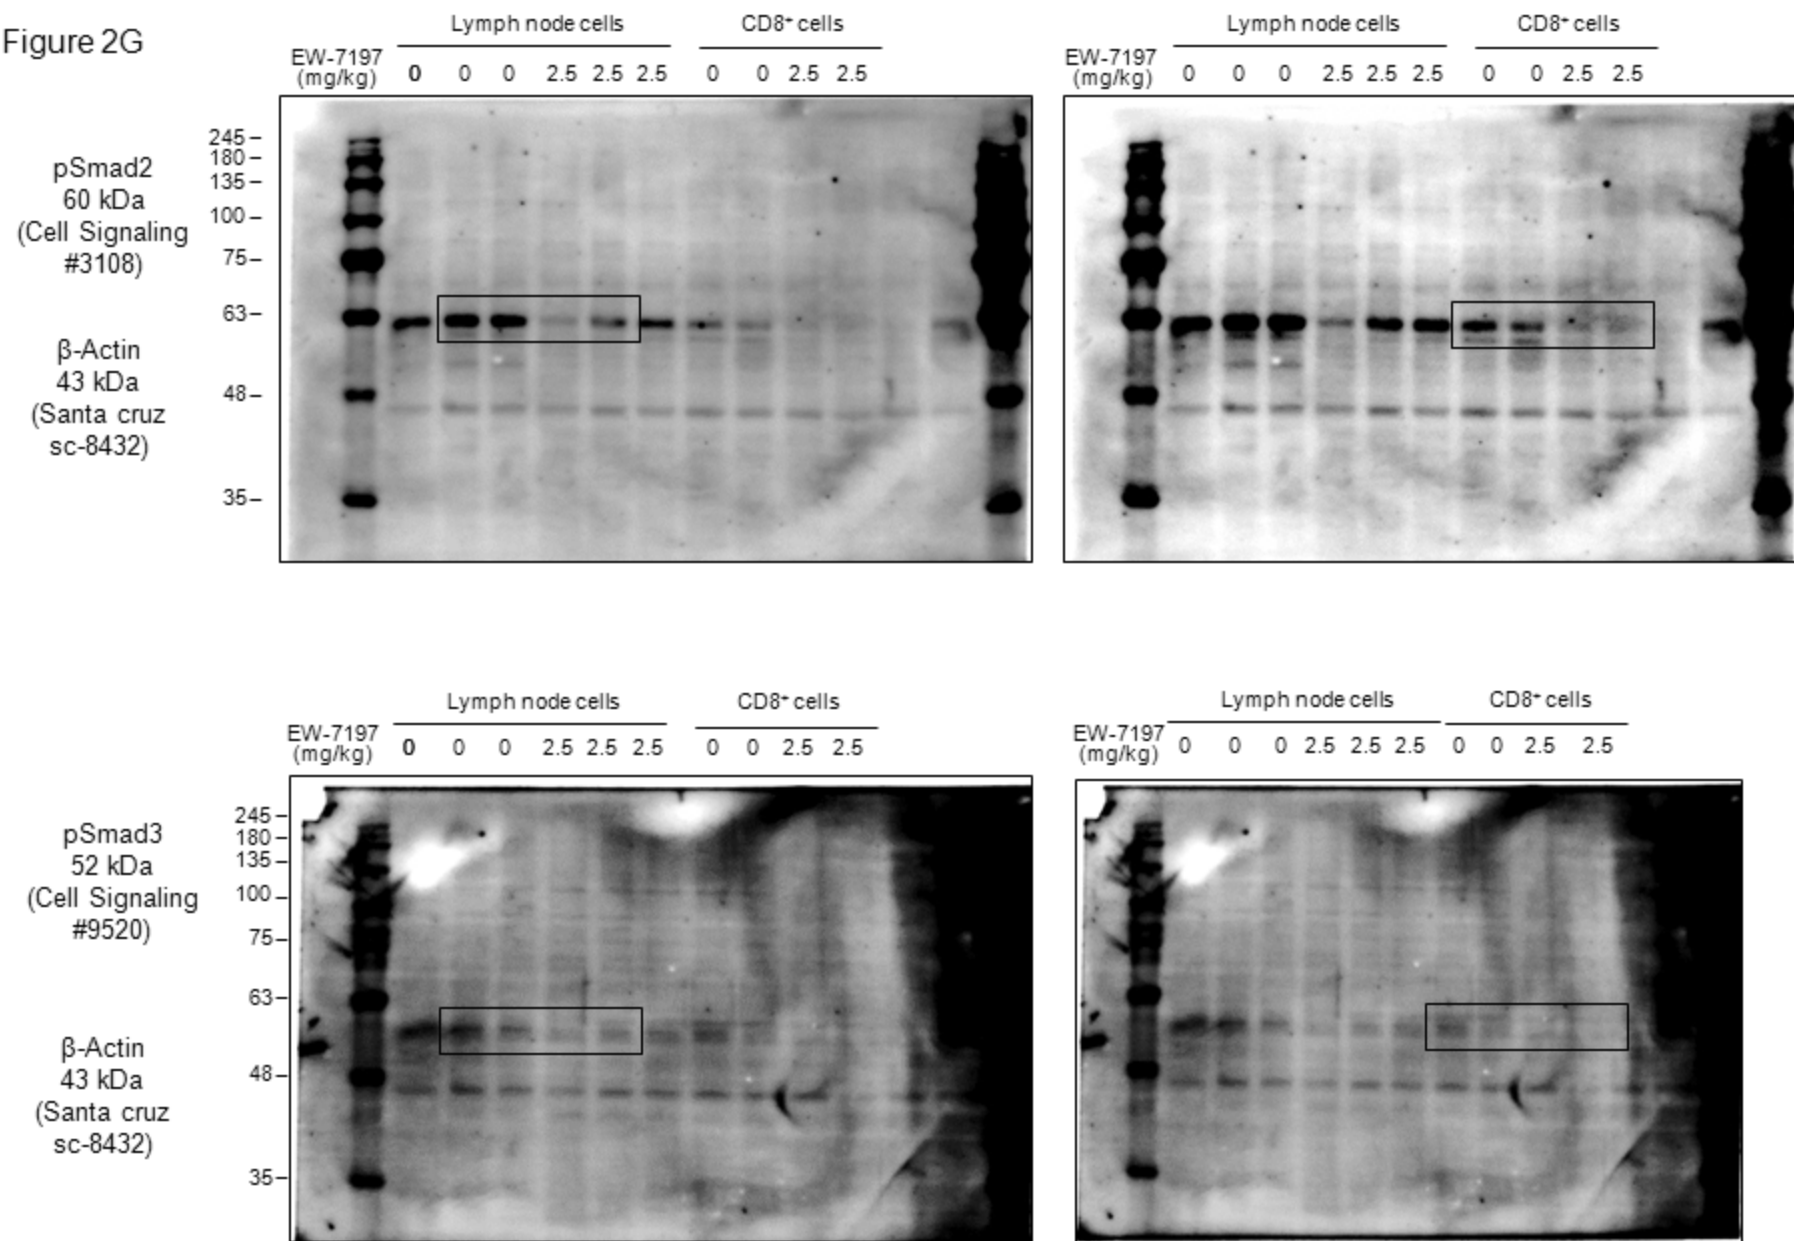

Figure 2G

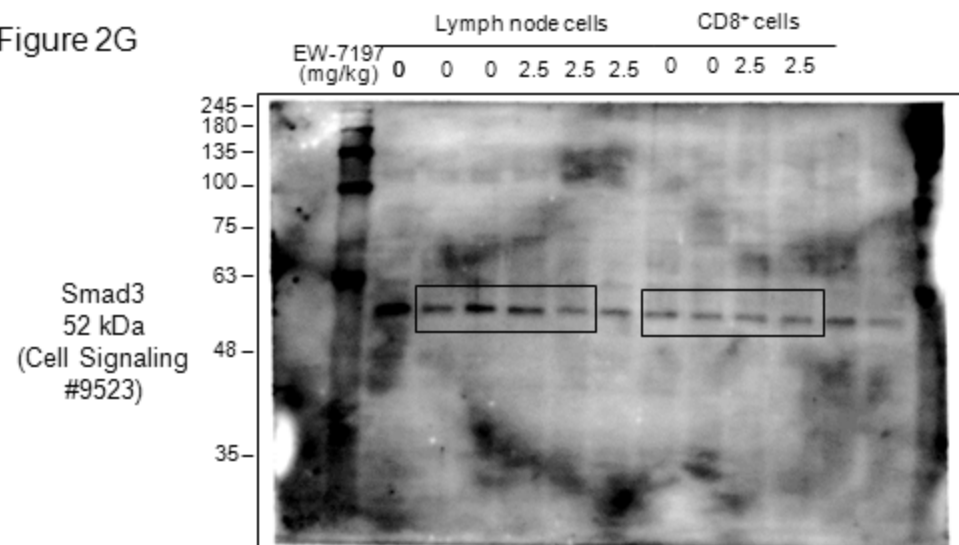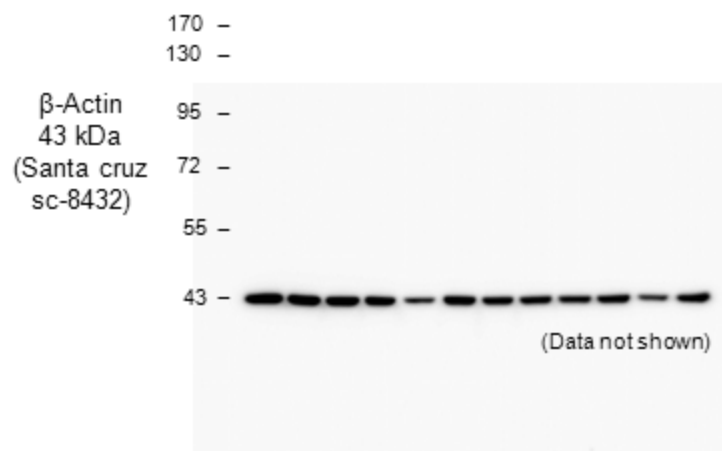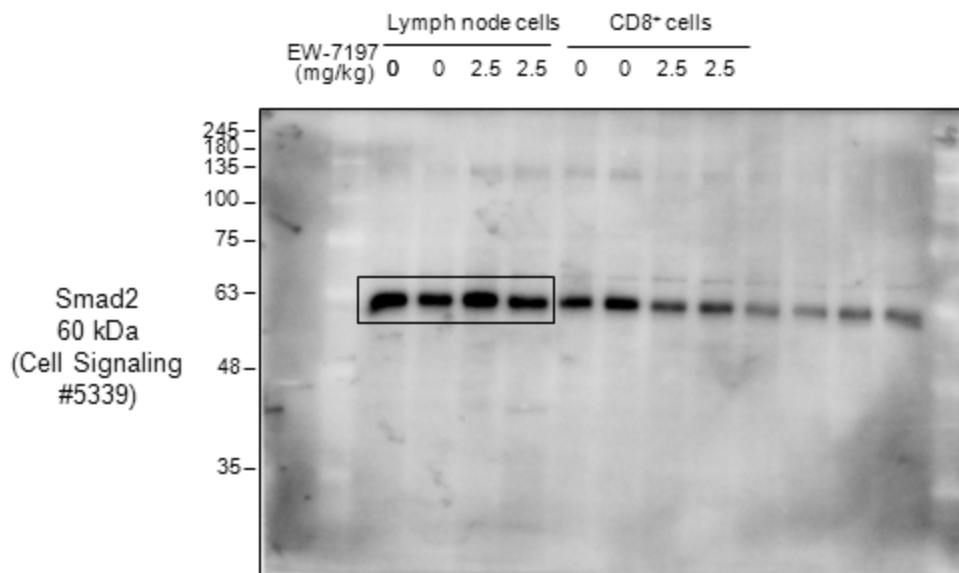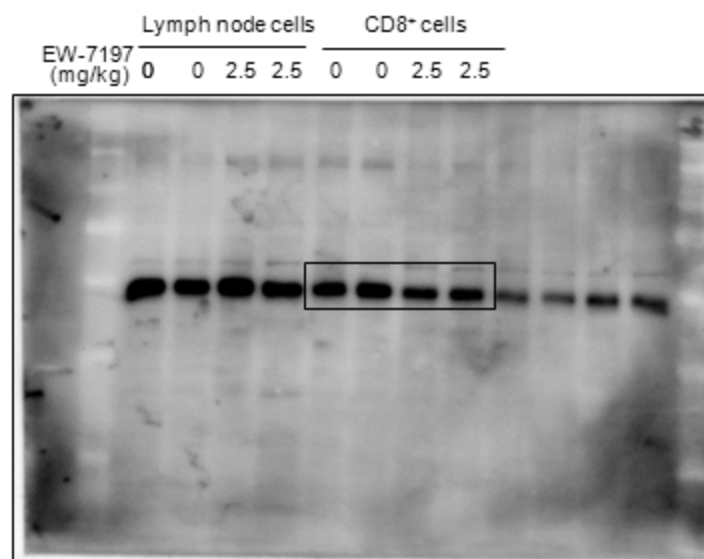

Figure 2G

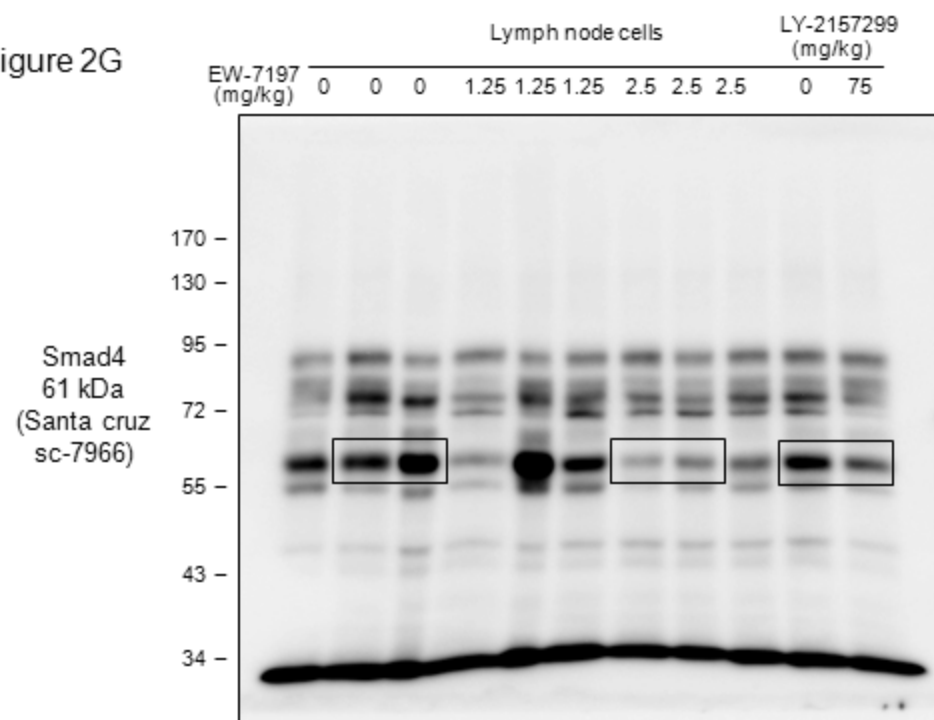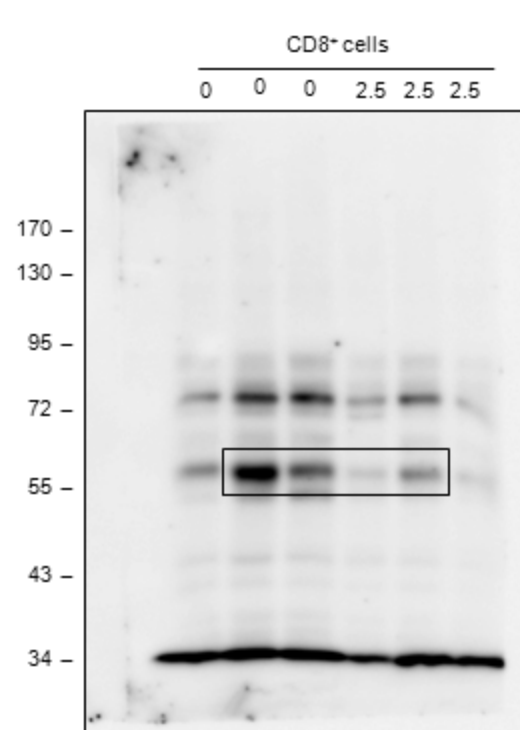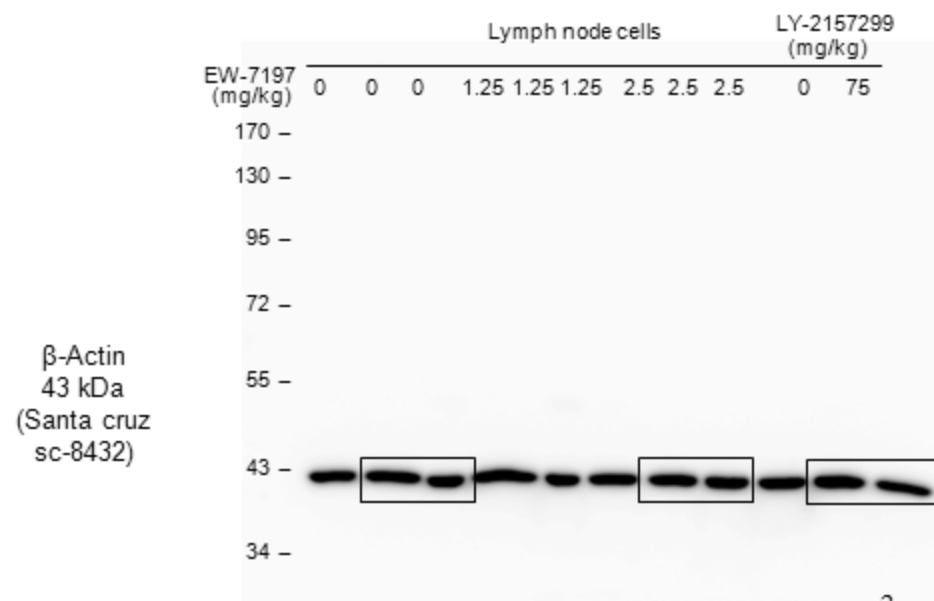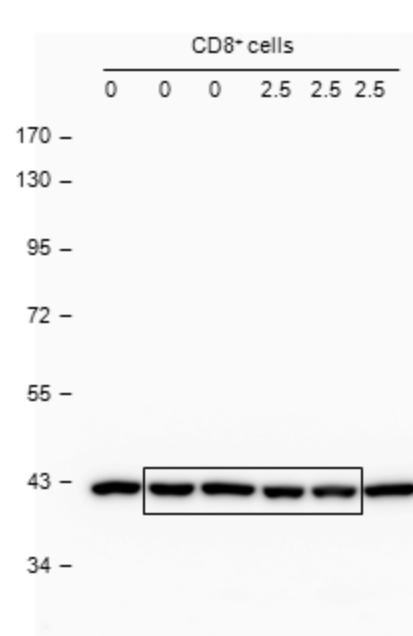

Figure 3B

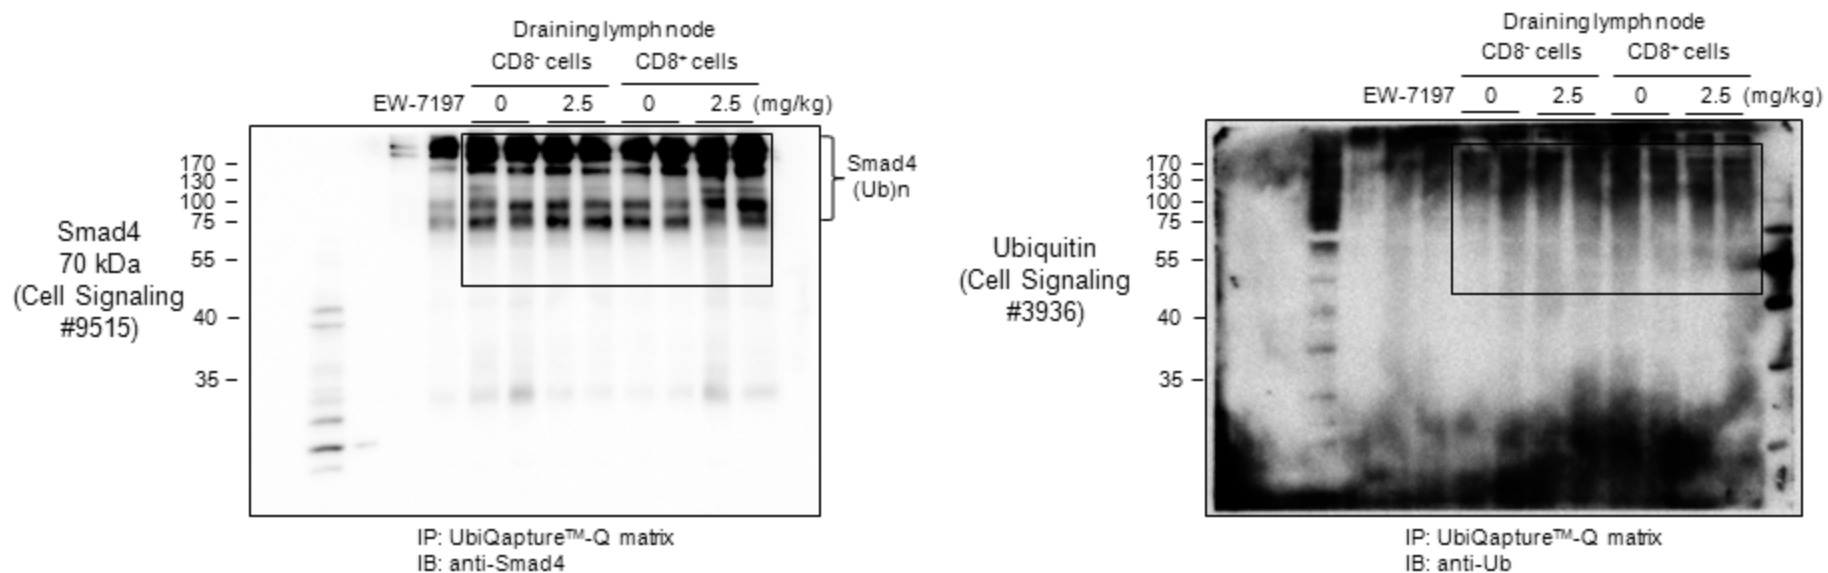

Figure 3C

|              | CD4 <sup>+</sup> cells |     |     |     |     | CD8 <sup>+</sup> cells |     |     |     |     |            |
|--------------|------------------------|-----|-----|-----|-----|------------------------|-----|-----|-----|-----|------------|
| EW-7197      | 0                      | 0   | 0.5 | 1.0 | 2.0 | 0                      | 0   | 0.5 | 1.0 | 2.0 | ( $\mu$ M) |
| TGF- $\beta$ | 0                      | 5.0 | 0   | 0   | 0   | 0                      | 5.0 | 0   | 0   | 0   | (ng/mL)    |
| MG-132       | 0                      | 0   | 0   | 0   | 0   | 0                      | 0   | 0   | 0   | 0   | ( $\mu$ M) |

pSmad2  
60 kDa  
(Cell Signaling  
#3108)

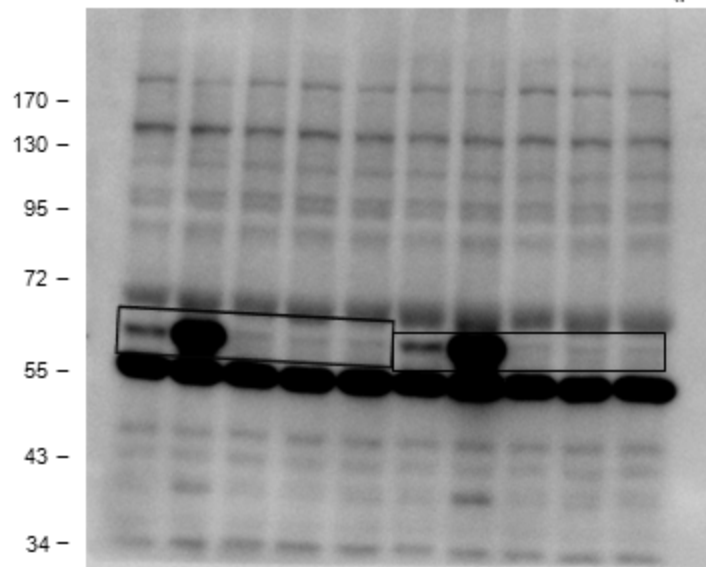

|              | CD4 <sup>+</sup> cells |     |     |     |     | CD8 <sup>+</sup> cells |     |     |     |     |            |
|--------------|------------------------|-----|-----|-----|-----|------------------------|-----|-----|-----|-----|------------|
| EW-7197      | 0                      | 0   | 0.5 | 1.0 | 2.0 | 0                      | 0   | 0.5 | 1.0 | 2.0 | ( $\mu$ M) |
| TGF- $\beta$ | 0                      | 5.0 | 0   | 0   | 0   | 0                      | 5.0 | 0   | 0   | 0   | (ng/mL)    |
| MG-132       | 0                      | 0   | 0   | 0   | 0   | 0                      | 0   | 0   | 0   | 0   | ( $\mu$ M) |

Smad4  
61 kDa  
(Santa cruz  
sc-7966)

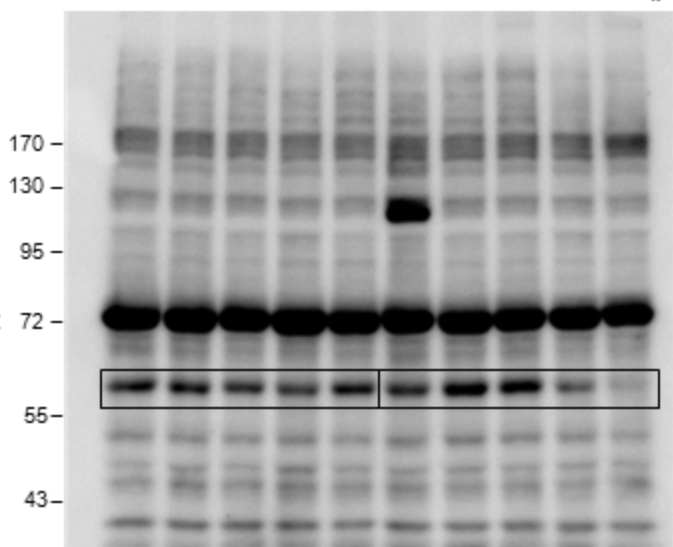

|              | CD4 <sup>+</sup> cells |     |     |     |     | CD8 <sup>+</sup> cells |     |     |     |     |            |
|--------------|------------------------|-----|-----|-----|-----|------------------------|-----|-----|-----|-----|------------|
| EW-7197      | 0                      | 0   | 0.5 | 1.0 | 2.0 | 0                      | 0   | 0.5 | 1.0 | 2.0 | ( $\mu$ M) |
| TGF- $\beta$ | 0                      | 5.0 | 0   | 0   | 0   | 0                      | 5.0 | 0   | 0   | 0   | (ng/mL)    |
| MG-132       | 0                      | 0   | 0   | 0   | 0   | 0                      | 0   | 0   | 0   | 0   | ( $\mu$ M) |

pSmad3  
52 kDa  
(Cell Signaling  
#9520)

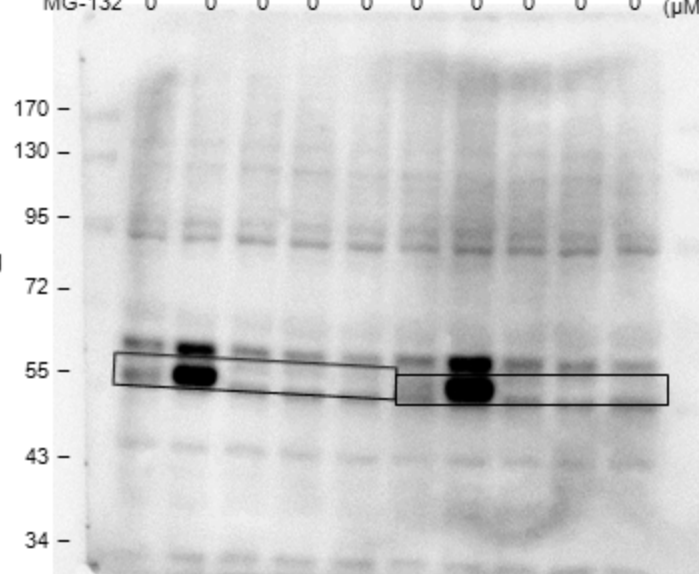

|              | CD4 <sup>+</sup> cells |     |     |     |     | CD8 <sup>+</sup> cells |     |     |     |     |            |
|--------------|------------------------|-----|-----|-----|-----|------------------------|-----|-----|-----|-----|------------|
| EW-7197      | 0                      | 0   | 0.5 | 1.0 | 2.0 | 0                      | 0   | 0.5 | 1.0 | 2.0 | ( $\mu$ M) |
| TGF- $\beta$ | 0                      | 5.0 | 0   | 0   | 0   | 0                      | 5.0 | 0   | 0   | 0   | (ng/mL)    |
| MG-132       | 0                      | 0   | 0   | 0   | 0   | 0                      | 0   | 0   | 0   | 0   | ( $\mu$ M) |

$\beta$ -Actin  
43 kDa  
(Santa cruz  
sc-8432)

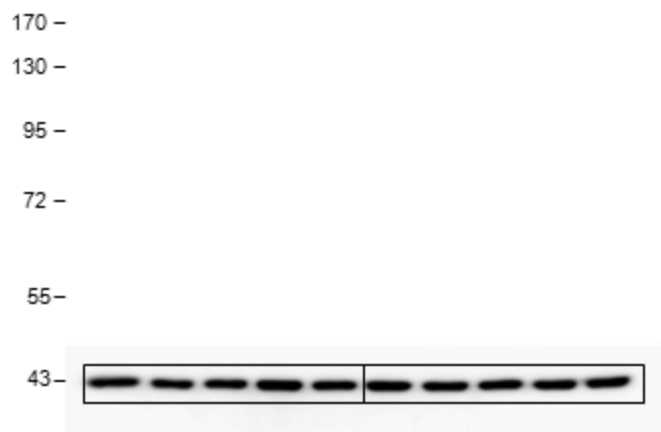

Figure 3C

|              | CD4 <sup>+</sup> cells |     |     |     |     | CD8 <sup>+</sup> cells |     |     |     |     |            |
|--------------|------------------------|-----|-----|-----|-----|------------------------|-----|-----|-----|-----|------------|
| EW-7197      | 0                      | 0   | 0.5 | 1.0 | 2.0 | 0                      | 0   | 0.5 | 1.0 | 2.0 | ( $\mu$ M) |
| TGF- $\beta$ | 0                      | 5.0 | 0   | 0   | 0   | 0                      | 5.0 | 0   | 0   | 0   | (ng/mL)    |
| MG-132       | 5.0                    | 5.0 | 5.0 | 5.0 | 5.0 | 5.0                    | 5.0 | 5.0 | 5.0 | 5.0 | ( $\mu$ M) |

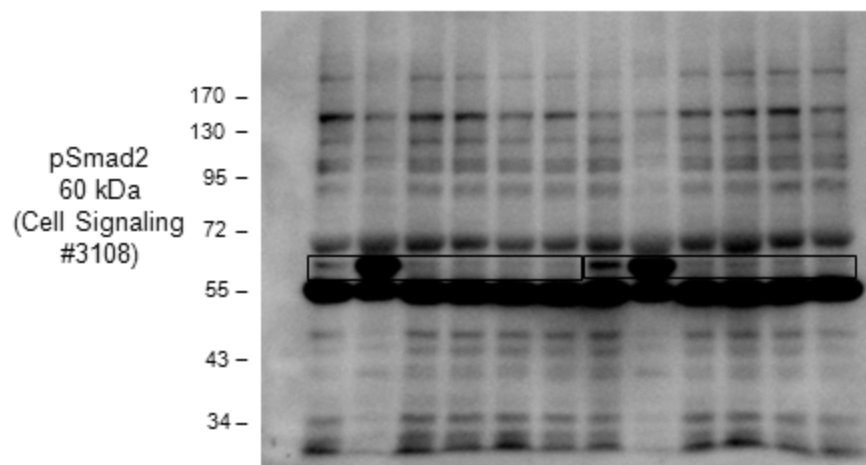

|              | CD4 <sup>+</sup> cells |     |     |     |     | CD8 <sup>+</sup> cells |     |     |     |     |            |
|--------------|------------------------|-----|-----|-----|-----|------------------------|-----|-----|-----|-----|------------|
| EW-7197      | 0                      | 0   | 0.5 | 1.0 | 2.0 | 0                      | 0   | 0.5 | 1.0 | 2.0 | ( $\mu$ M) |
| TGF- $\beta$ | 0                      | 5.0 | 0   | 0   | 0   | 0                      | 5.0 | 0   | 0   | 0   | (ng/mL)    |
| MG-132       | 5.0                    | 5.0 | 5.0 | 5.0 | 5.0 | 5.0                    | 5.0 | 5.0 | 5.0 | 5.0 | ( $\mu$ M) |

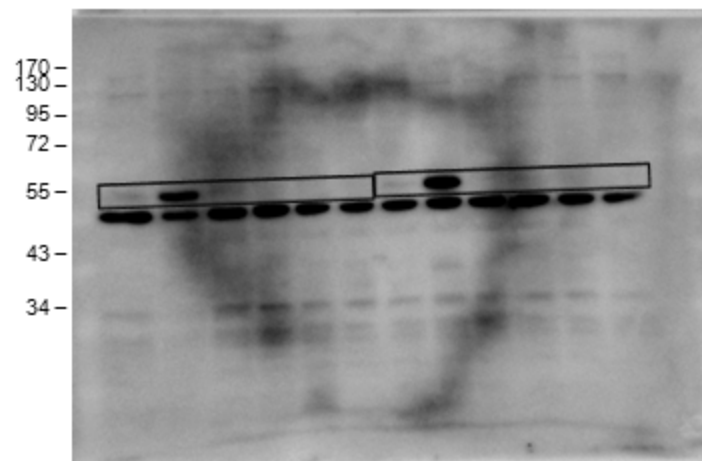

|              | CD4 <sup>+</sup> cells |     |     |     |     | CD8 <sup>+</sup> cells |     |     |     |     |            |
|--------------|------------------------|-----|-----|-----|-----|------------------------|-----|-----|-----|-----|------------|
| EW-7197      | 0                      | 0   | 0.5 | 1.0 | 2.0 | 0                      | 0   | 0.5 | 1.0 | 2.0 | ( $\mu$ M) |
| TGF- $\beta$ | 0                      | 5.0 | 0   | 0   | 0   | 0                      | 5.0 | 0   | 0   | 0   | (ng/mL)    |
| MG-132       | 5.0                    | 5.0 | 5.0 | 5.0 | 5.0 | 5.0                    | 5.0 | 5.0 | 5.0 | 5.0 | ( $\mu$ M) |

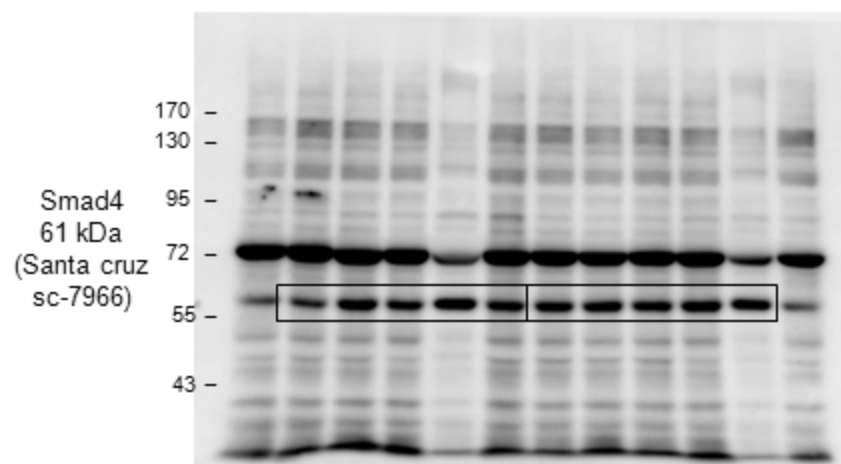

|              | CD4 <sup>+</sup> cells |     |     |     |     | CD8 <sup>+</sup> cells |     |     |     |     |            |
|--------------|------------------------|-----|-----|-----|-----|------------------------|-----|-----|-----|-----|------------|
| EW-7197      | 0                      | 0   | 0.5 | 1.0 | 2.0 | 0                      | 0   | 0.5 | 1.0 | 2.0 | ( $\mu$ M) |
| TGF- $\beta$ | 0                      | 5.0 | 0   | 0   | 0   | 0                      | 5.0 | 0   | 0   | 0   | (ng/mL)    |
| MG-132       | 5.0                    | 5.0 | 5.0 | 5.0 | 5.0 | 5.0                    | 5.0 | 5.0 | 5.0 | 5.0 | ( $\mu$ M) |

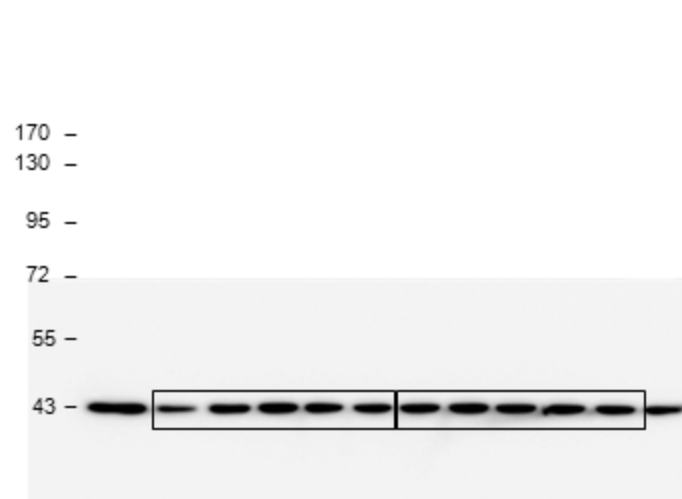

Figure 3D

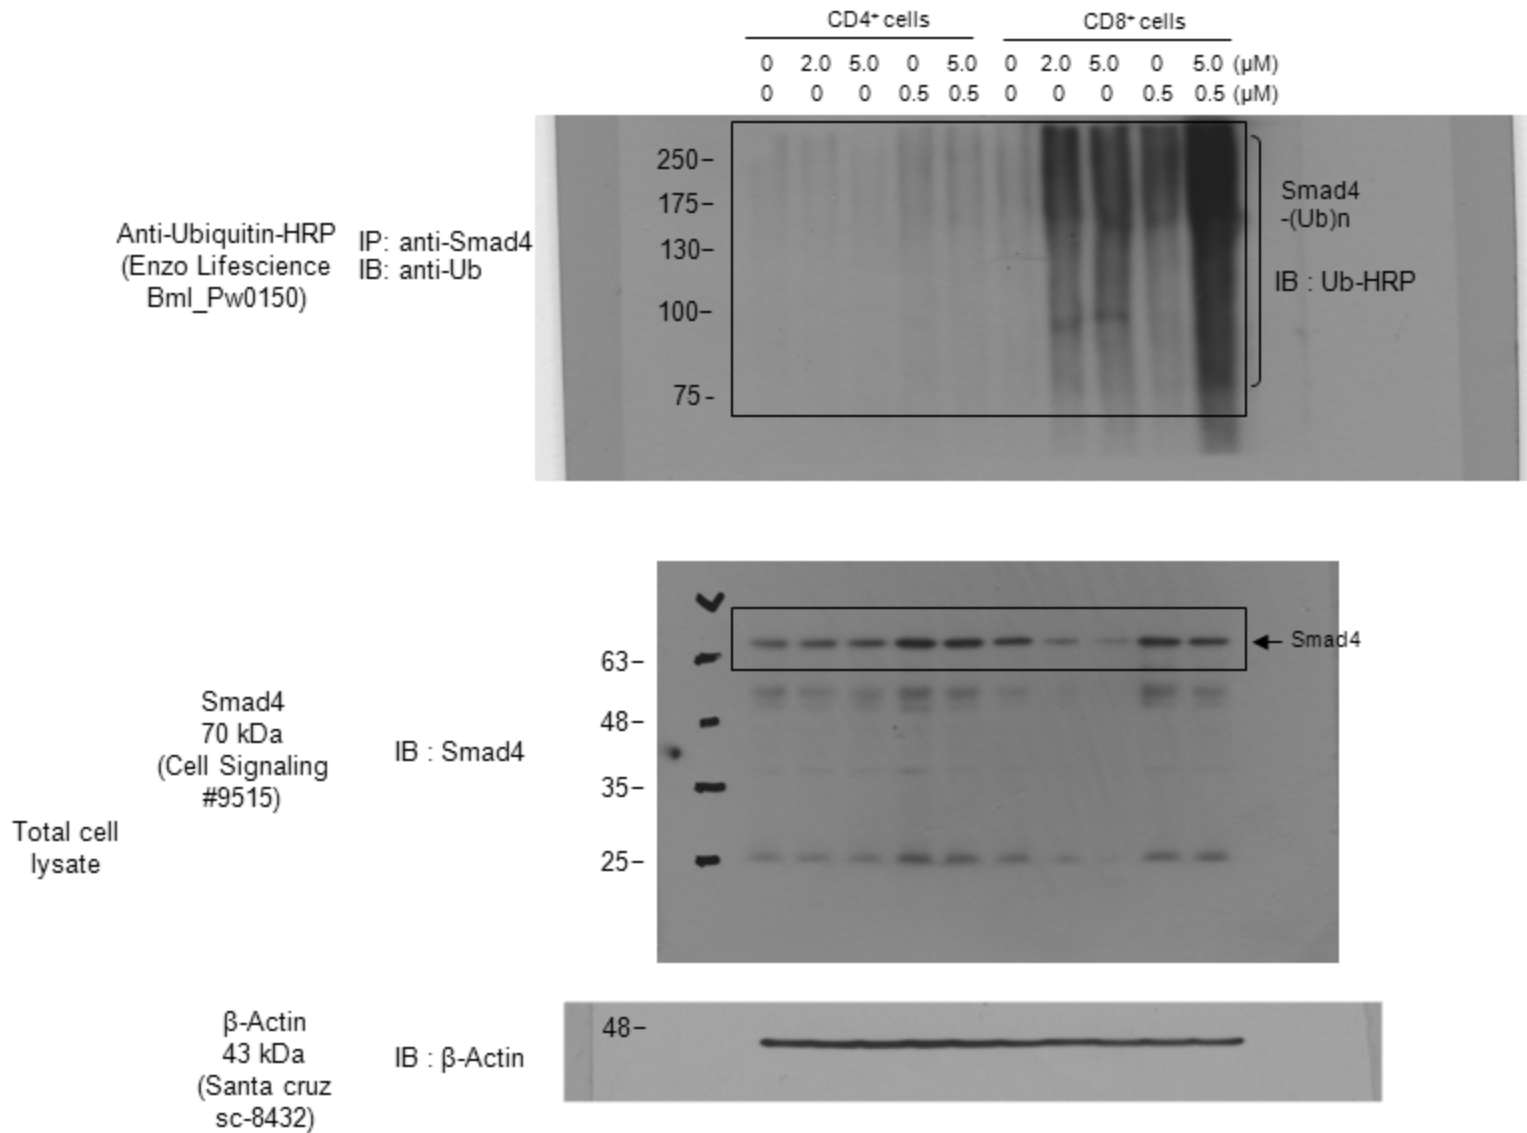

Combination with PLA probe anti-rabbit PLUS, PLA probe anti-mouse MINUS and rat anti-CD8 antibody  
(Technical negative controls for Figure 2E, 3A and Supporting Information Figure 7)

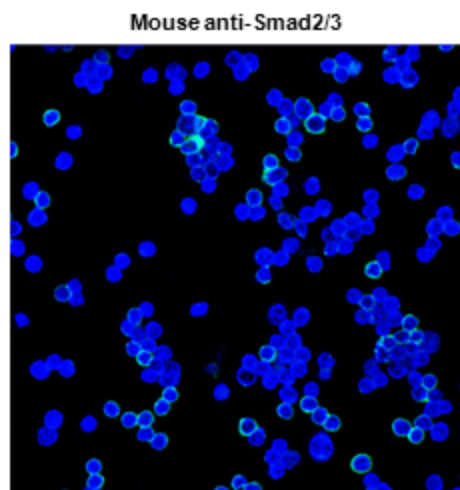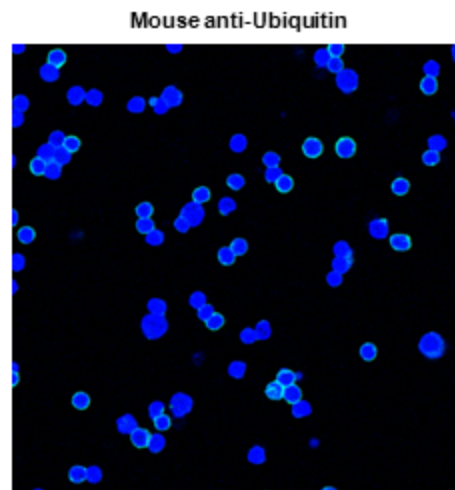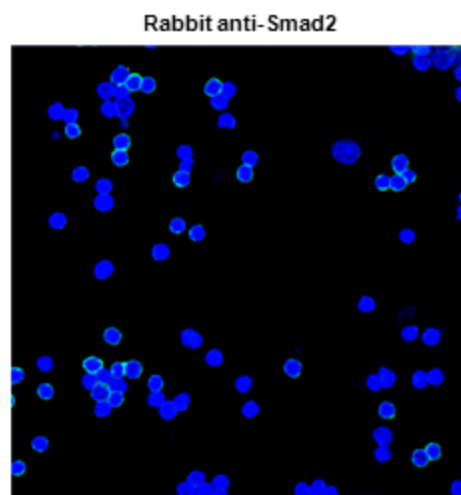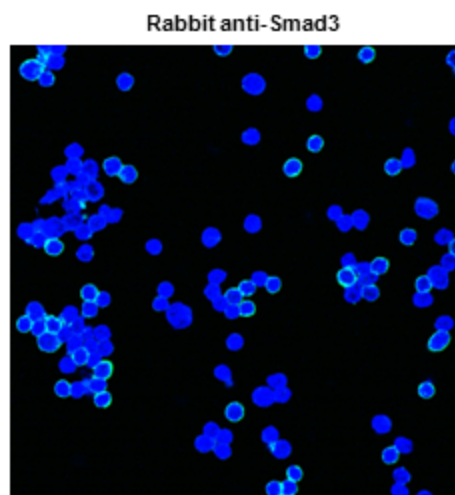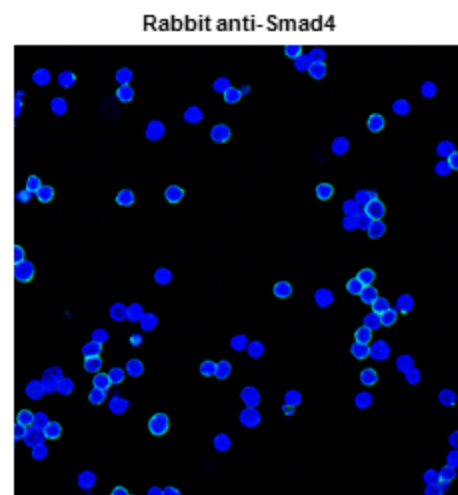

10  $\mu$ m



Supporting Information Figure 14

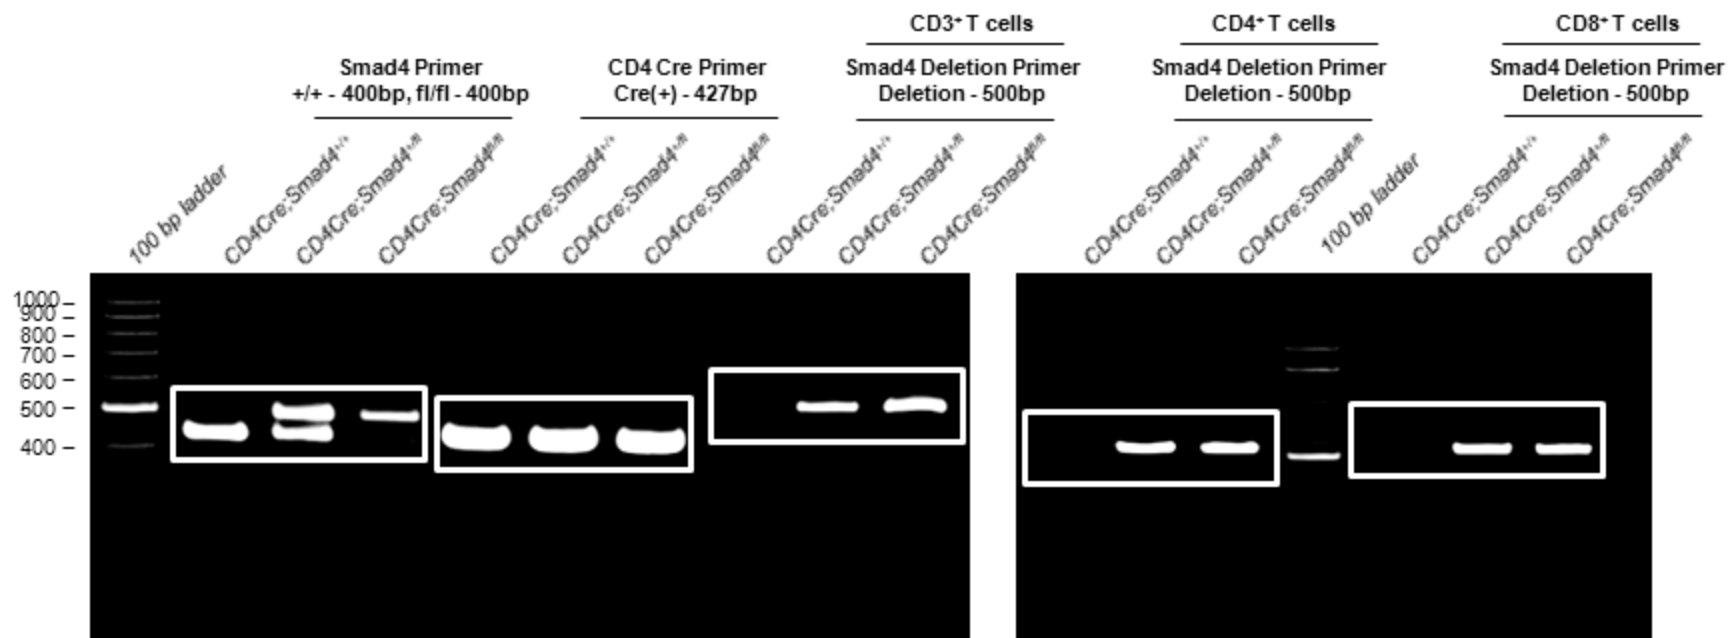

Supplement: emmm0005-1720-SD3.pdf [file emmm0005-1720-SD3.pdf]
