# Supplementary material for: Activin receptor-like kinase5 inhibition suppresses mouse melanoma by ubiquitin degradation of Smad4, thereby derepressing eomesodermin in cytotoxic T lymphocytes
Source: EMBO Mol Med. 2013 Oct 11;5(11):1720–39. doi: 10.1002/emmm.201302524 (PMC3840488; doi:10.1002/emmm.201302524)
Supplement: Supplementary file 2 [file emmm0005-1720-SD2.pdf]

## Supporting Information

|                                          |       |         |
|------------------------------------------|-------|---------|
| <b>Supporting Materials and Methods</b>  | ----- | Page 2  |
| <b>Supporting Materials and Methods</b>  | ----- | Page 3  |
| <b>Supporting Information Table I.</b>   | ----- | Page 4  |
| <b>Supporting Information Table II.</b>  | ----- | Page 5  |
| <b>Supporting Information Table III.</b> | ----- | Page 6  |
| <b>Supporting Information Figure 1.</b>  | ----- | Page 7  |
| <b>Supporting Information Figure 2.</b>  | ----- | Page 8  |
| <b>Supporting Information Figure 3.</b>  | ----- | Page 9  |
| <b>Supporting Information Figure 4.</b>  | ----- | Page 10 |
| <b>Supporting Information Figure 5.</b>  | ----- | Page 11 |
| <b>Supporting Information Figure 6.</b>  | ----- | Page 12 |
| <b>Supporting Information Figure 7.</b>  | ----- | Page 13 |
| <b>Supporting Information Figure 8.</b>  | ----- | Page 14 |
| <b>Supporting Information Figure 9.</b>  | ----- | Page 15 |
| <b>Supporting Information Figure 10.</b> | ----- | Page 16 |
| <b>Supporting Information Figure 11.</b> | ----- | Page 17 |
| <b>Supporting Information Figure 12.</b> | ----- | Page 18 |
| <b>Supporting Information Figure 13.</b> | ----- | Page 19 |
| <b>Supporting Information Figure 14.</b> | ----- | Page 20 |
| <b>Supporting Information Figure 15.</b> | ----- | Page 21 |

### **Detection of cell cycle and apoptosis of B16 cells**

B16 cells were cultured in the absence or presence of TGF- $\beta$  (0, 0.5, 1.0, 5.0 ng/ml) and/or EW-7197 (0, 0.25, 0.5, 1.0  $\mu$ M). For cell cycle analysis, DNA content was determined by Propidium iodide (PI) (BD Pharmingen). Briefly, B16 cells were fixed by cold 80% ethanol overnight at -20°C. Fixed cells were washed twice in phosphate-buffered saline (PBS), 1% bovine serum albumin (BSA), and then resuspended in PI solution in PBS containing RNase A (0.1 mg/ml; Sigma-Aldrich). Phosphatidylserine exposure was measured using Annexin V Apoptosis Detection Kit APC (eBioscience). B16 cells were resuspended in 1 $\times$  binding buffer (10<sup>5</sup> cells/100  $\mu$ L) and incubated with Annexin V-APC for 15 minutes at room temperature in the dark. Cells were washed, resuspended in 1 $\times$  binding buffer (200  $\mu$ L). Propidium iodide (PI) staining solution was added into each sample and analyzed by flowcytometry immediately.

### **Knockdown of Smurf1 and Smurf2 by shRNA**

The short hairpin RNA (shRNA) sequences specific for endogenous *Smurf1* and *Smurf2* are described previously (Lee YS et al, 2011). To generate shRNAs specific for endogenous *Smurf1* and *Smurf2*, double-stranded oligomers containing restriction enzyme sites, a sense sequence, and a loop sequence with its antisense sequence were designed and cloned into *Age*I and *Eco*RI sites of the pLKO-puro vector (Clontech). Lentiviruses expressing each shRNA were produced by a lentiviral packaging system from Invitrogen. Lentivirus expressing mutant *Gfp* shRNA was used as a negative control for lentivirus infection. Expression levels of *Smurf1* and *Smurf2* mRNA were measured by real-time quantitative PCR with the primers: Smurf1 5'-TGCCATCAGCAGATTGAAAG-3', 5'-GTTCTTCGTTCTCCAGCAG-3', Smurf2 5'-GTGAAGAGCTCGGTCCTTTG-3', 5'-TCGCTTGATCTTGGCACTG-3'

**Table I.** Primer sequences for quantitative RT-PCR

| Gene         | Sense primer             | Antisense primer         |
|--------------|--------------------------|--------------------------|
| <i>Gapdh</i> | TGGTGAAGGTCGGTGTGAAC     | CCATGTAGTTGAGGTCAATGAAGG |
| <i>T-bet</i> | GCCAGGGAACCG CTTATATG    | GACGATCATCTGGGTCACATTGT  |
| <i>Eomes</i> | TGAATGAACCTTCCAAGACTCAGA | GGCTTGAGGCAAAGTGTTGACA   |
| <i>Ifng</i>  | ACTGGCAAAAGGATGGTGAC     | GACCTGTGGGTTGTTGACCT     |
| <i>Gzmb</i>  | GGACTGCAAAGACTGGCTTC     | ATAACATTCTCGGGGCACTG     |
| <i>Prfl</i>  | TTTCGCCTGGTACAAAAACC     | AGGGCTGTAAGGACCGAGAT     |
| <i>Fasl</i>  | CATCACAACCACTCCCCTG      | GTTCTGCCAGTTCCTTCTGC     |
| <i>Smad4</i> | GCAGCTCTTGGATGAAGTCC     | GGCAGCAAACACATCTCTCA     |

**Table II.** Primer sequences for the proximal promoter regions of Eomes

| Eomes promoter | Sense primer                       | Antisense primer                   |
|----------------|------------------------------------|------------------------------------|
| -2.0 kb        | TTTGGTACCCTGTGCCACGCCAGCG<br>TTTCC | AAACTCGAGGCTTTAGCGAATCGCAG<br>ACGG |
| -0.7 kb        | TTTGGTACCATGTTCGCAGACTTCA<br>AACCC | AAACTCGAGGCTTTAGCGAATCGCAG<br>ACGG |
| -0.37 kb       | TTTGGTACCTGTGAGTGTAGGGGTC<br>CTGA  | AAACTCGAGGCTTTAGCGAATCGCAG<br>ACGG |
| -0.23 kb       | TTTGGTACCTTTCTTGCGGAAGGAA<br>AGG   | AAACTCGAGGCTTTAGCGAATCGCAG<br>ACGG |

**Table III.** Primer sequences for ChIP

| <b>Eomes promoter</b> | <b>Sense primer</b>      | <b>Antisense primer</b> |
|-----------------------|--------------------------|-------------------------|
| -912 to -720          | AGTCTCAACAATGGGGTCGT     | CGTGTGAGTGTGCATGTCTG    |
| -680 to -449          | GGGTCGTAGAAACCCTAGAAATCA | GAGACAGGGTCTCCCATGGA    |
| -538 to -321          | ATCCTCCACAGACATGCACA     | GTTCTTAGCCCCAGGGAGAC    |
| -239 to -86           | AGAGCACTGGGTGCTACTGGTT   | CCCTTCGCTCCCAGCAT       |
| -172 to +72           | CTGCCCTCTCCACGCCAGGT     | AAACAGCAGGGCAGGAGCCG    |

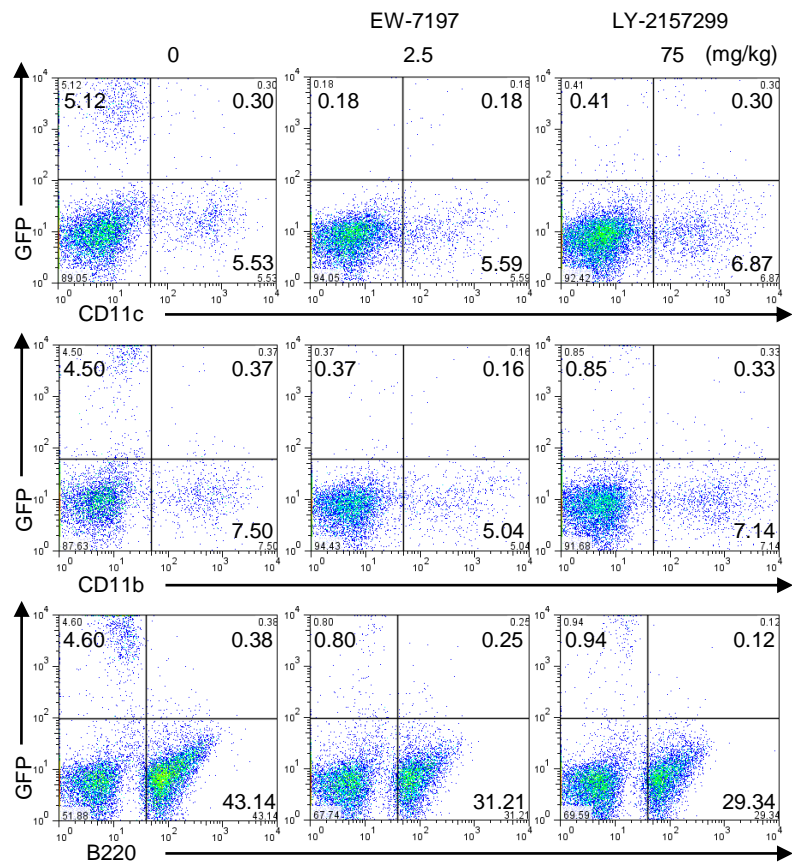

**Supporting Information Figure 1. Detection of lymph node metastasis.** Dot plots by FACS analyses show GFP<sup>+</sup>CD11c<sup>-</sup>, GFP<sup>+</sup>CD11b<sup>-</sup>, and GFP<sup>+</sup>B220<sup>-</sup> cells in the dLNs of melanoma-bearing mice three weeks after inoculation.

Supporting Information Figure 2

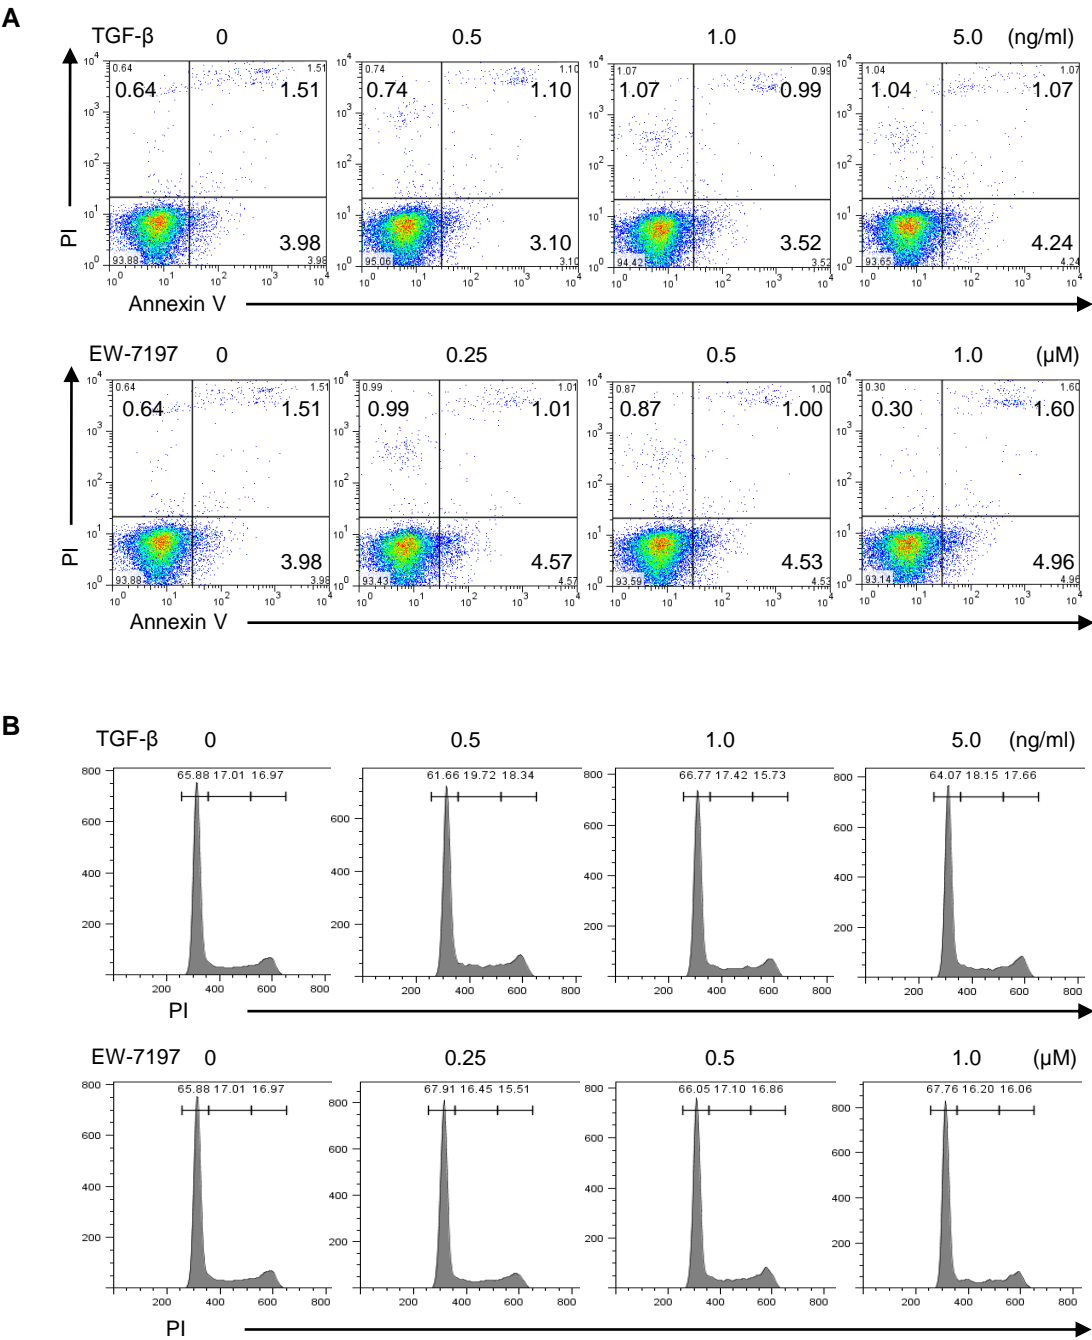

**Supporting Information Figure 2. TGF- $\beta$  does not affect apoptosis and cell cycle of B16 cells.** B16 cells were treated with TGF- $\beta$  (0, 0.5, 1.0, 5.0 ng/ml) or EW-7197 (0, 0.25, 0.5, 1.0  $\mu$ M) for 72 h. **A.** Apoptosis was determined by Annexin V and PI staining. **B.** Cell cycle was determined by PI staining using flowcytometry.

# Supporting Information Figure 3

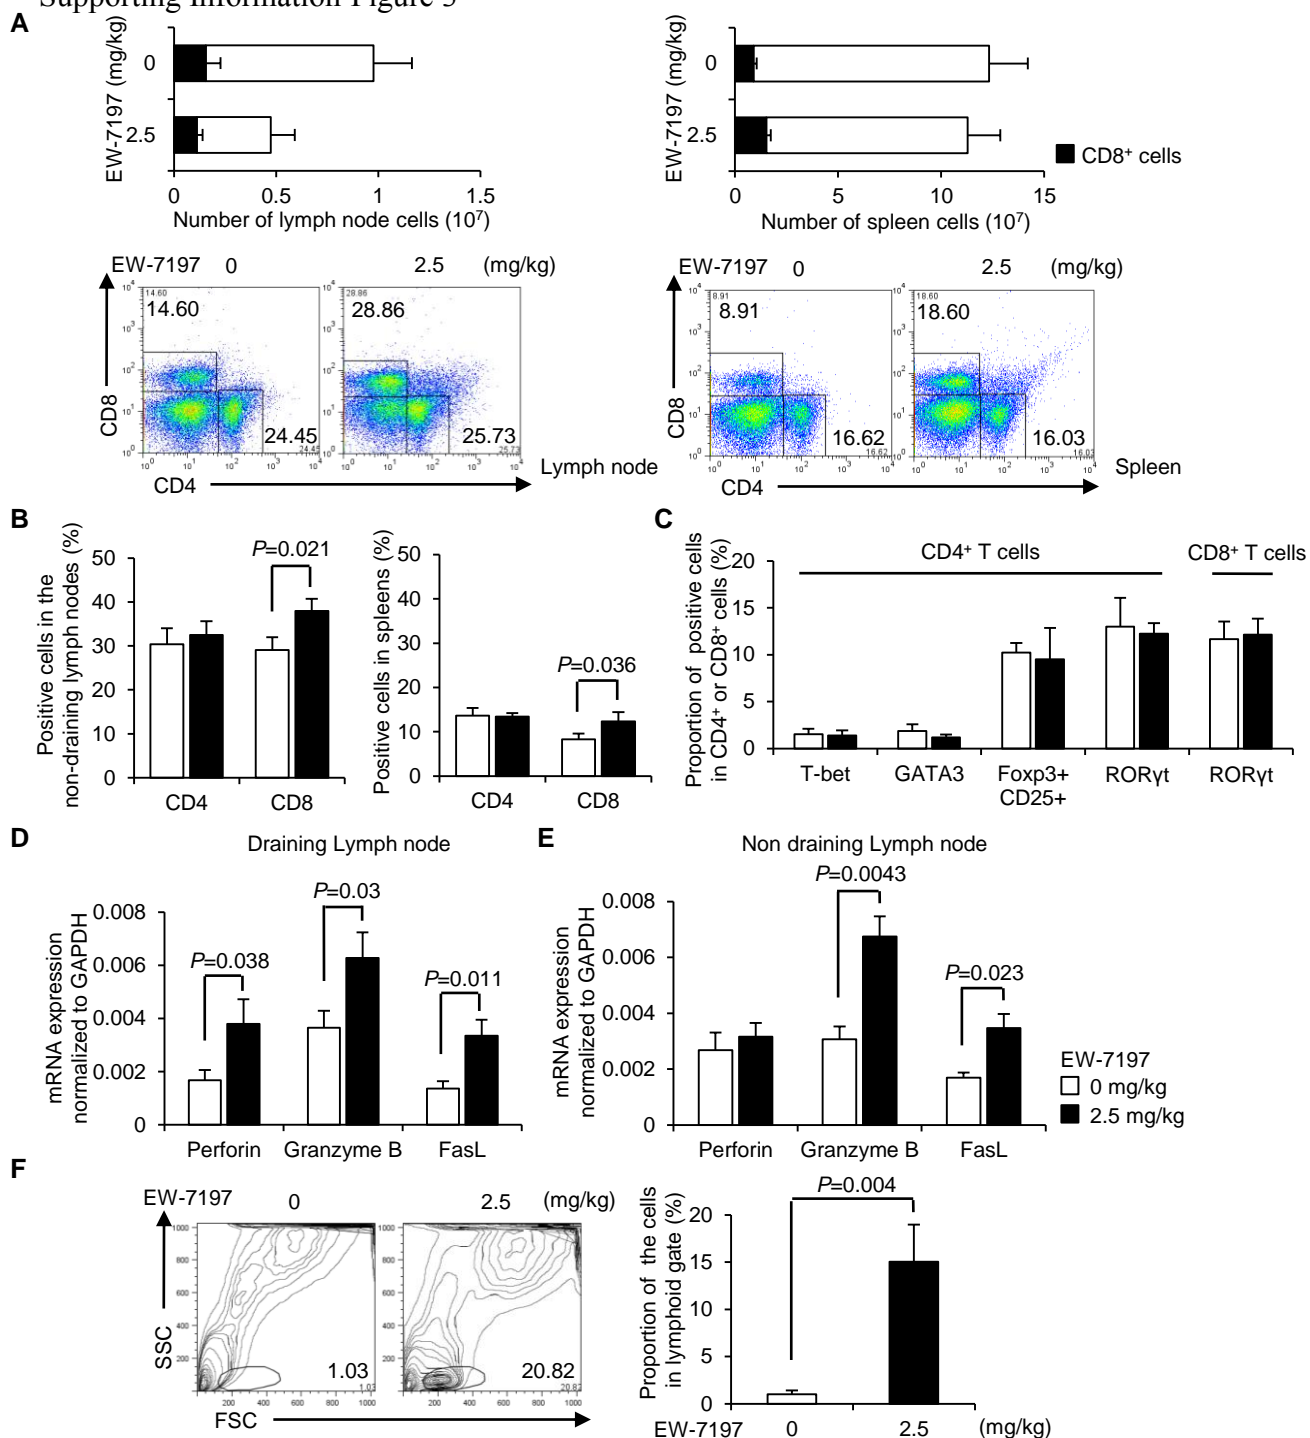

**Supporting Information Figure 3. Oral administration of EW-7197 suppresses melanoma and LN metastases with enhanced CTL activity.** Data are shown as mean + SEM ( $n = 5-10$ /group).  $P$  values were calculated by 2-tailed unpaired Student's  $t$  test. **A.** Total and CD8<sup>+</sup> cell numbers of LNs and spleens in the melanoma-bearing mice. Representative dot plots of CD4/8 are shown. **B.** Percentages of CD4/8 subsets in the non-dLNs and spleens. **C.** Percentages of effector T cell subsets in the dLNs. **D,E.** qPCR analyses for mRNA levels of the cytolytic molecules in the dLNs and the non-dLNs. **F.** Representative FSC/SSC contour plots of enriched tumor-infiltrated cells by density gradient centrifugation.

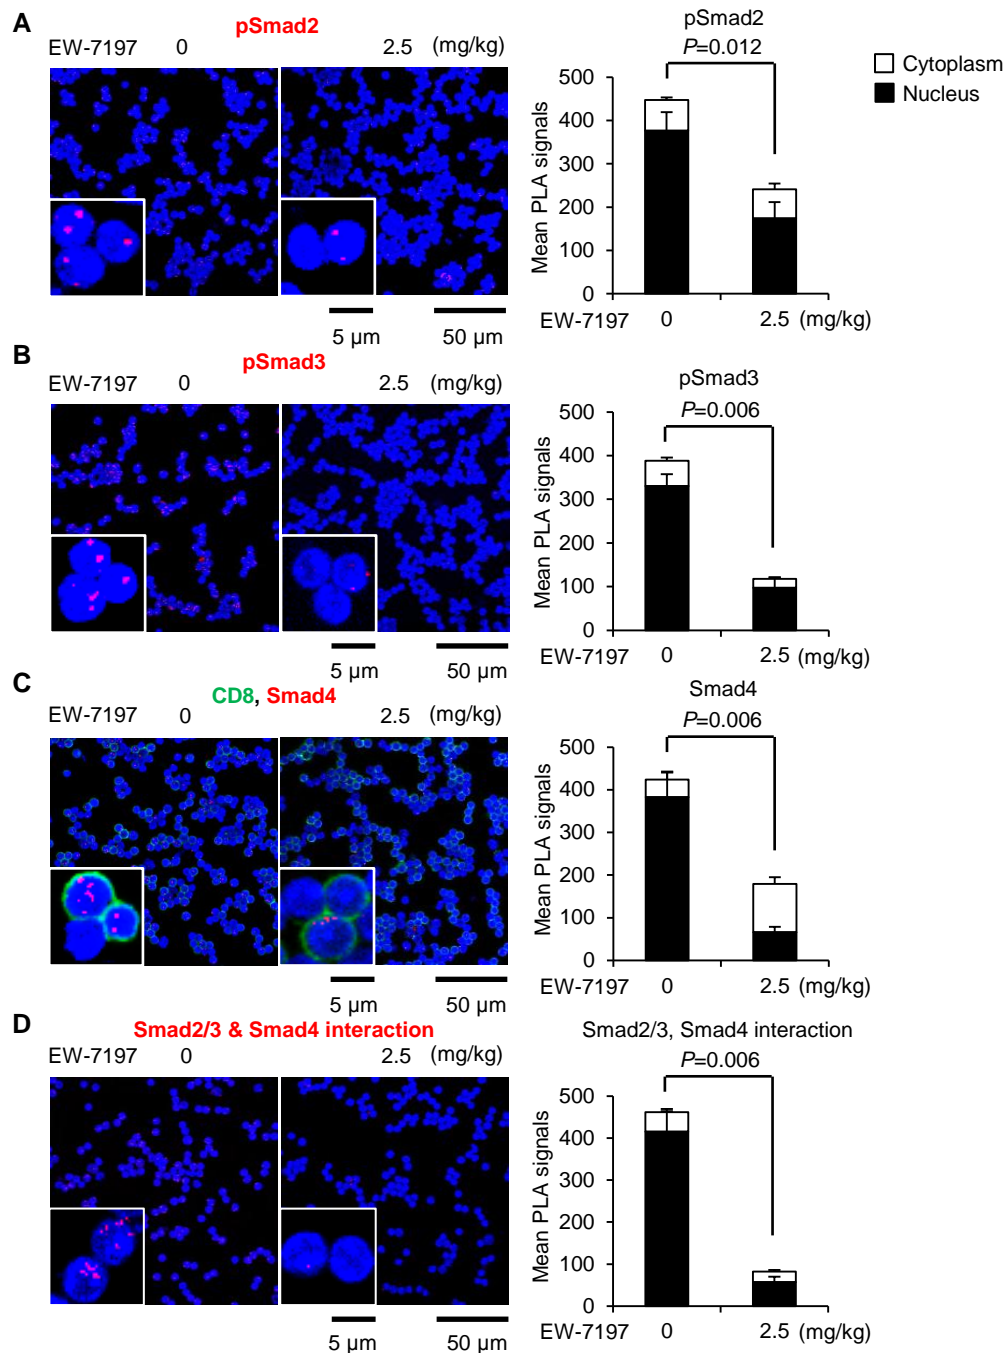

**Supporting Information Figure 4. Oral administration of EW-7197 inhibits TGF- $\beta$  signaling and downregulates Smad4 in spleen cells of melanoma-bearing mice. A-D.** Expression of phospho-Smad2, phospho-Smad3, Smad4, and the interaction between Smad2/3 and Smad4 from EW-7197-treated mice was determined by PLA. Images were acquired by confocal microscope, LSM700 (scale bars: 5  $\mu$ m, 50  $\mu$ m). Graphs show the quantification of the red dots expressed in nucleus and cytoplasm. Data are shown as mean + SEM ( $n = 5$ /group).  $P$  values were calculated by 2-tailed unpaired Student's  $t$  test.

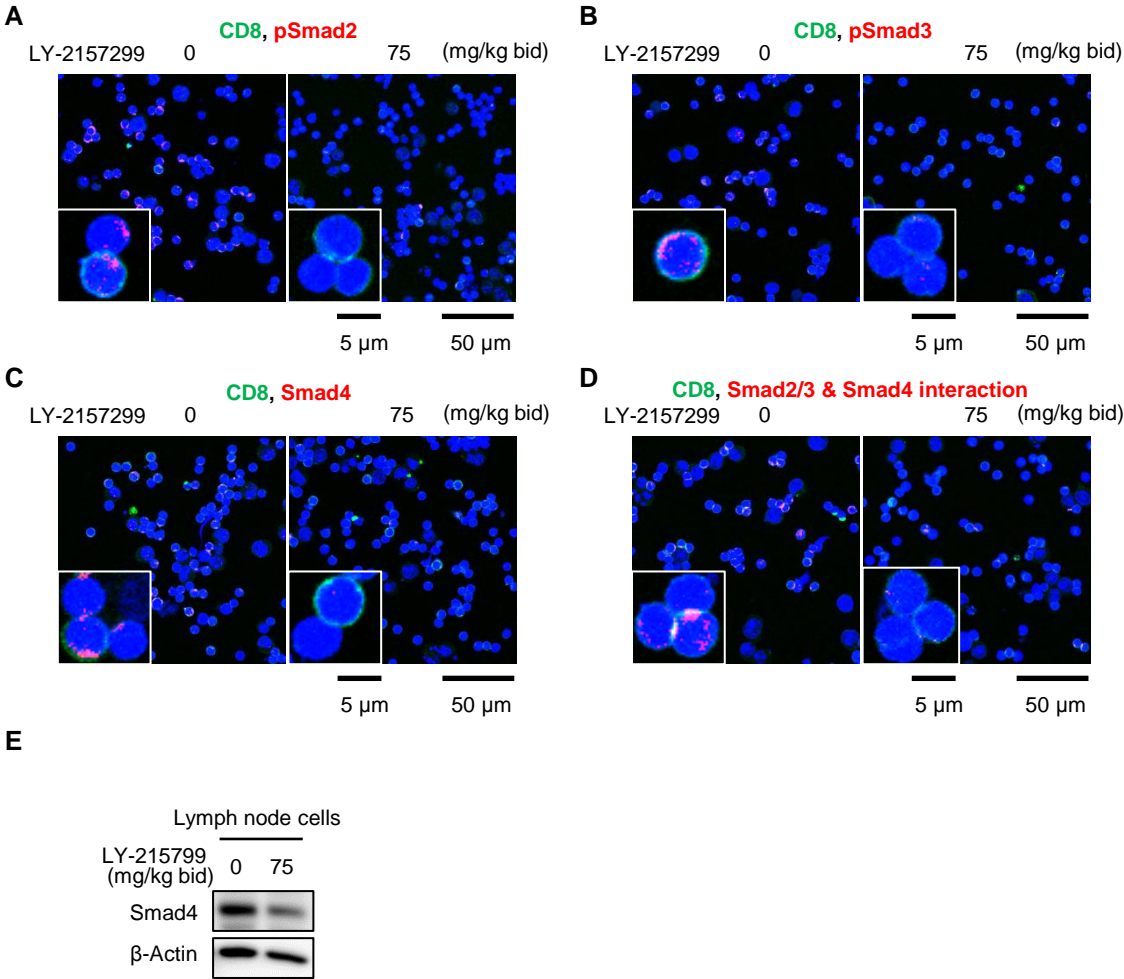

**Supporting Information Figure 5. Oral administration of LY-2157299 inhibits TGF-β signaling and downregulates Smad4 in dLN cells of melanoma-bearing mice. A-D.** Expression of phospho-Smad2, phospho-Smad3, Smad4, and the interaction between Smad2/3 and Smad4 in dLN cells from vehicle- or LY-2157299-treated mice was determined by PLA. Images were acquired by confocal microscope, LSM700 (scale bars: 5 μm, 50 μm). **E.** Smad4 and β-Actin in dLN cells from vehicle- or LY-2157299-treated mice were detected by Western blotting.

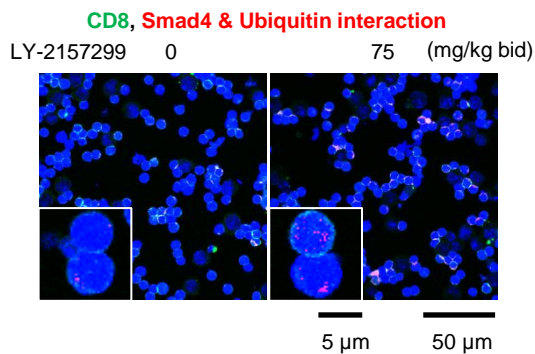

**Supporting Information Figure 6. LY-2157299 induces Smad4 ubiquitination in dLN cells of melanoma-bearing mice.** Interaction between Smad4 and ubiquitin in dLN cells of vehicle- or LY-2157299-treated melanoma-bearing mice was determined by PLA. Images were acquired by confocal microscope, LSM700 (scale bars: 5 μm, 50 μm).

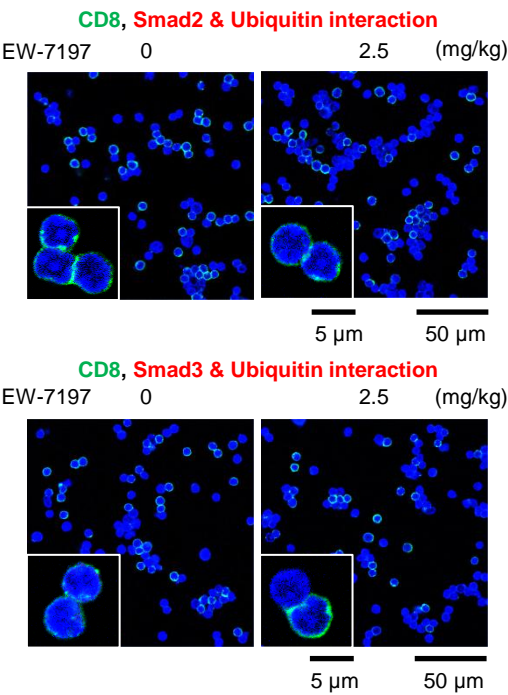

**Supporting Information Figure 7. R-Smads are not ubiquitinated in dLN cells of EW-7197-treated melanoma-bearing mice.** Interaction between Smad2 and ubiquitin or Smad3 and ubiquitin in dLN cells of vehicle- or EW-7197-treated melanoma-bearing mice was determined by PLA. Images were acquired by confocal microscope, LSM700 (scale bars: 5 μm, 50 μm).

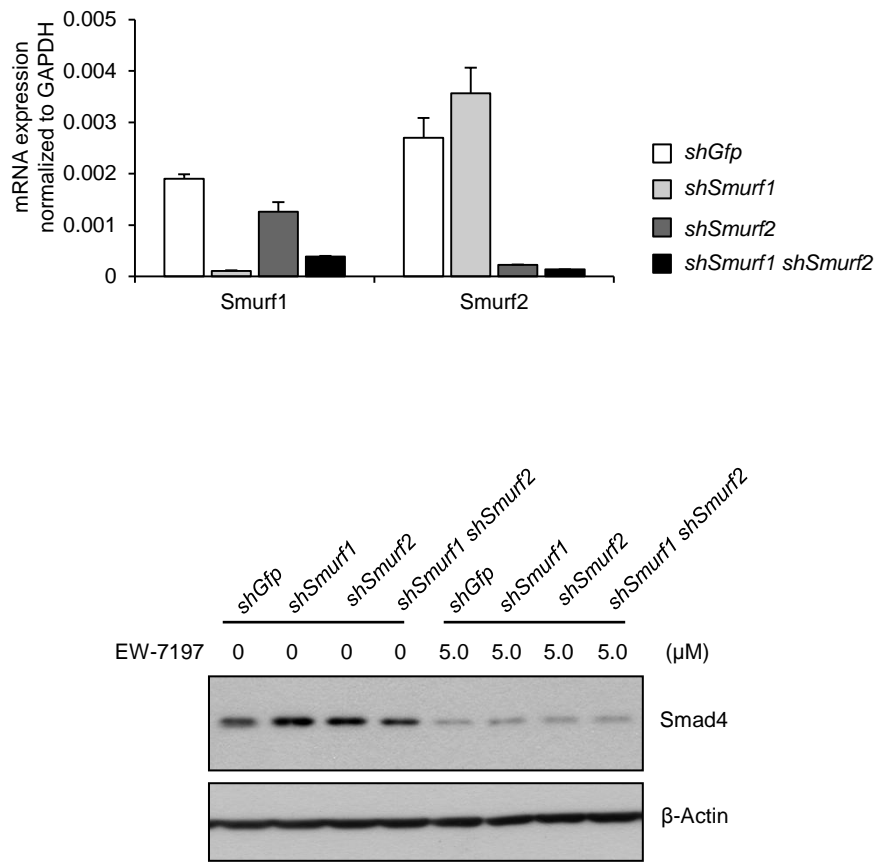

**Supporting Information Figure 8. Smurf1 and Smurf2 are not involved in degradation of Smad4 by ALK5 inhibition.** Knockdown of Smurf1 and/or Smurf2 by shRNA was confirmed by qPCR. Western blots show Smad4 and  $\beta$ -Actin in CD8<sup>+</sup> T cells stimulated with anti-CD3/28 antibodies with or without EW-7197 in vitro.

Supporting Information Figure 9

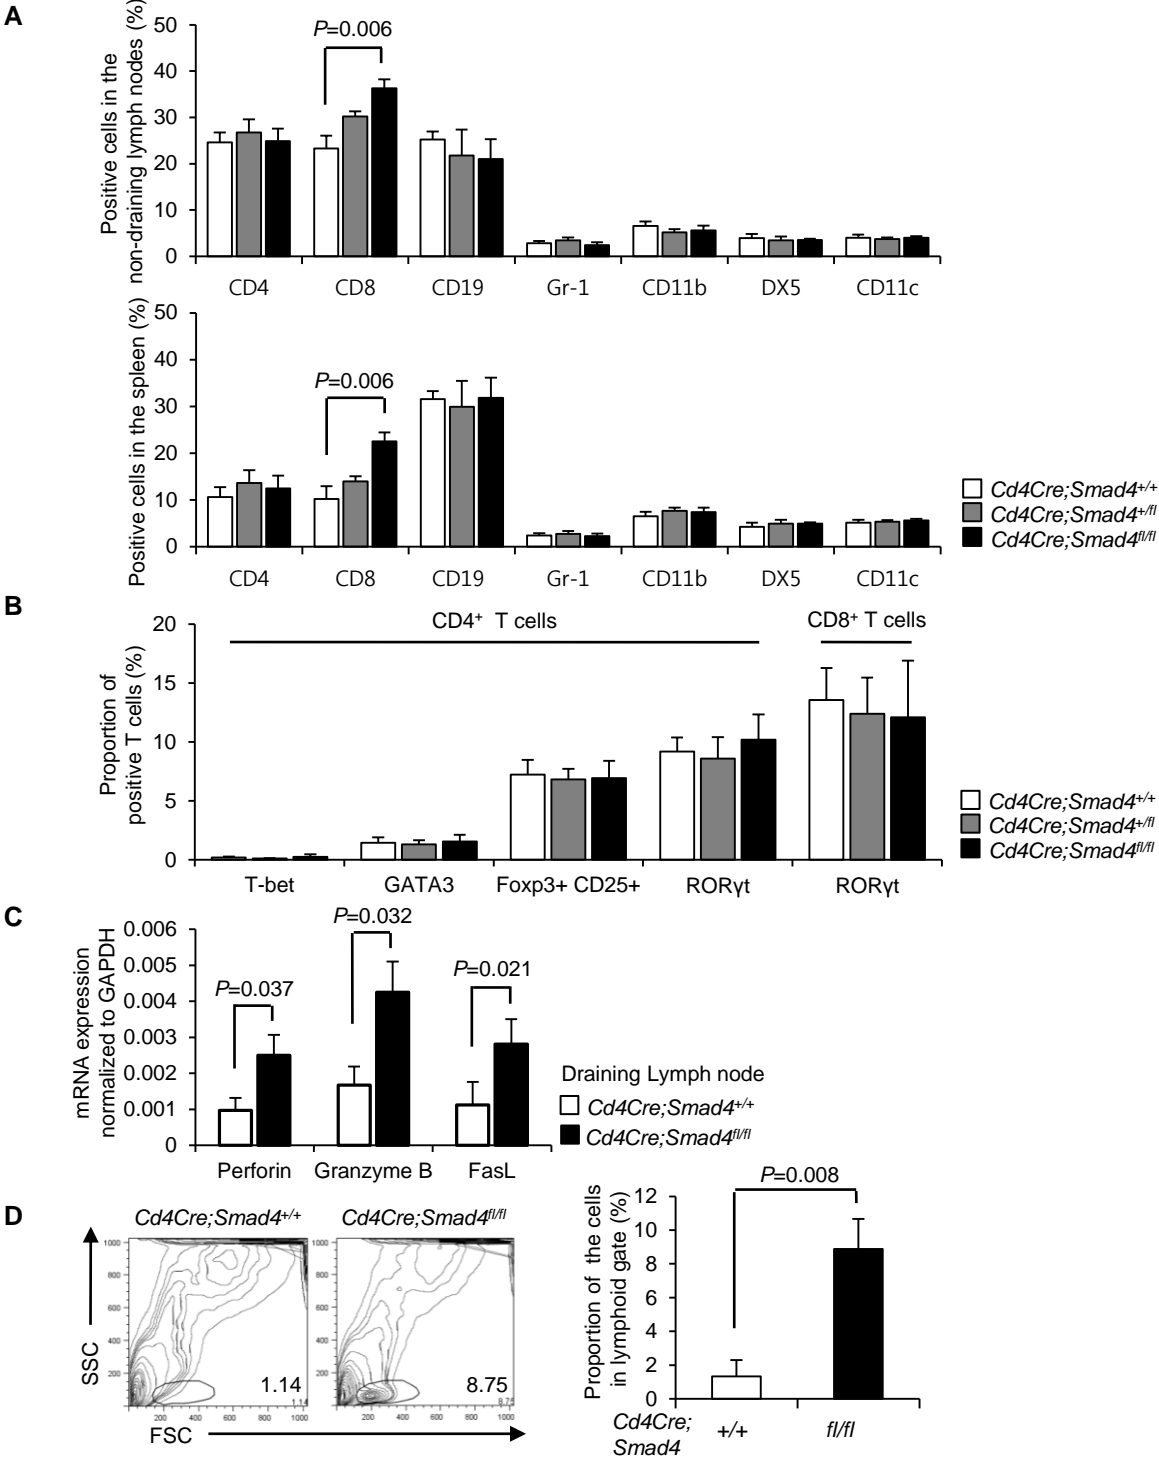

**Supporting Information Figure 9. T cell-specific *Smad4* deletion suppresses melanoma and LN metastases with enhanced CTL activity.** Data are shown as mean + SEM ( $n = 25$ /group).  $P$  values were calculated by 2-tailed unpaired Student's  $t$  test. **A.** Percentages of immune cell subsets in the non-dLNs and spleens ( $n = 25$ /genotype). **B.** Percentages of effector T cell subsets in the dLNs. **C.** qPCR analyses for mRNA levels of the cytolytic molecules in the dLNs. **D.** Representative FSC/SSC contour plots of enriched tumor-infiltrated cells by density gradient centrifugation.

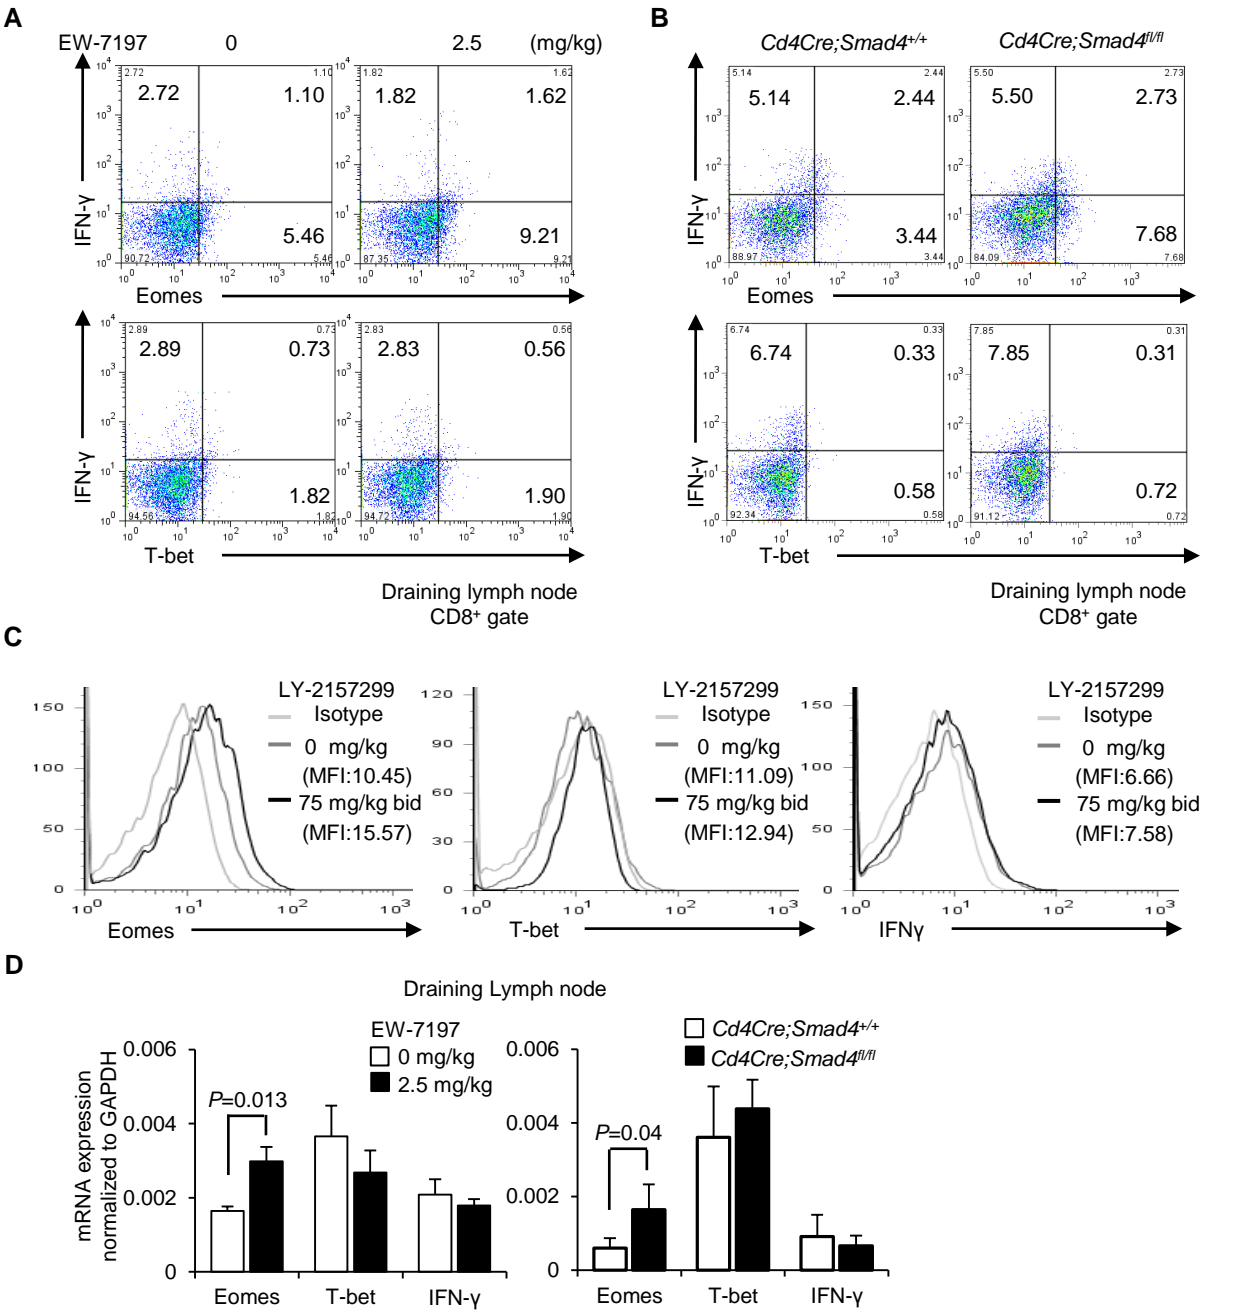

**Supporting Information Figure 10. Upregulation of Eomes in CD8<sup>+</sup> T cells by ALK5 inhibition or T cell-specific Smad4 deletion.** **A.** Representative dot plots show the expression of Eomes, T-bet, and IFN- $\gamma$  in dLN CD8<sup>+</sup> cells of vehicle- or EW-7197-treated melanoma-bearing mice. **B.** Representative dot plots show the expression of Eomes, T-bet, and IFN- $\gamma$  in dLN CD8<sup>+</sup> cells of *Cd4Cre;Smad4<sup>+/+</sup>* or *Cd4Cre;Smad4<sup>fl/fl</sup>* mice. **C.** Representative histograms show the expression of Eomes, T-bet, and IFN- $\gamma$  in dLN CD8<sup>+</sup> cells of vehicle- or LY-2157299-treated melanoma-bearing mice. **D.** qPCR analyses for mRNA levels in dLN cells of vehicle- or EW-7197-treated melanoma-bearing and *Cd4Cre;Smad4<sup>+/+</sup>* or *Cd4Cre;Smad4<sup>fl/fl</sup>* mice ( $n = 10/\text{group}$ ,  $n = 10/\text{genotype}$ ).

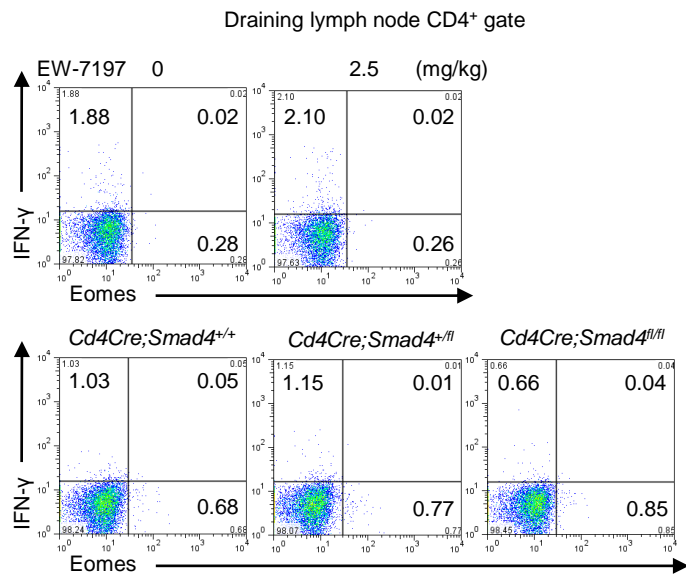

**Supporting Information Figure 11. Eomes is not expressed in CD4<sup>+</sup> cells in the dLNs of melanoma-bearing mice.** Representative dot plots show the expression of IFN- $\gamma$  and Eomes in CD4<sup>+</sup> cells from vehicle-treated, EW-7197-treated, *Cd4Cre;Smad4<sup>+/+</sup>*, *Cd4Cre;Smad4<sup>+/fl</sup>*, and *Cd4Cre;Smad4<sup>fl/fl</sup>* mice.



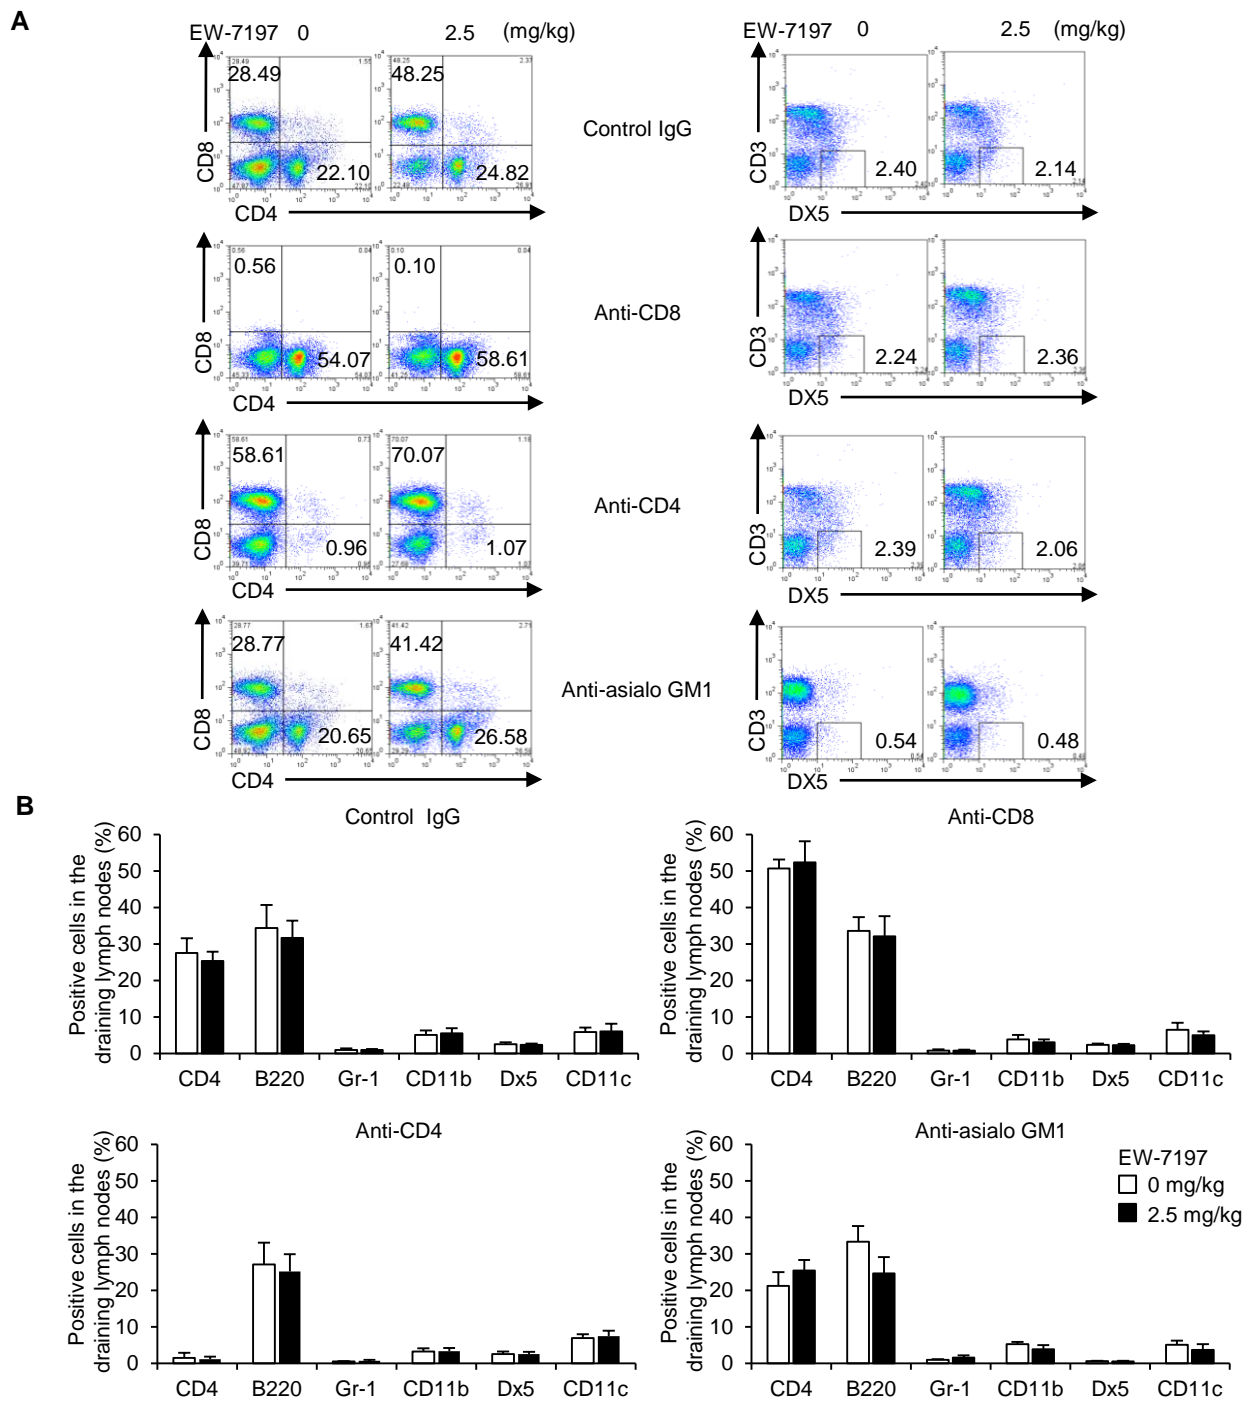

**Supporting Information Figure 13. Deletion of CD8<sup>+</sup> T cells, CD4<sup>+</sup> T cells, NK cells in vivo.** C57BL/6 mice were i.p. injected with control, anti-CD8, anti-CD4, or anti-asialo GM1 antibody at day -4, 0, 7, and 14 of melanoma inoculation (day 0), with vehicle or EW-7197 from 4 days after inoculation of GFP-expressing B16 cells (2×10<sup>5</sup>) into the left lower abdomen (*n* = 5-8/group). Data are shown as mean + SEM. **A.** Representative dot plots are shown for each antibody treatment. **B.** Graphs show the percentages of immune cell subsets.

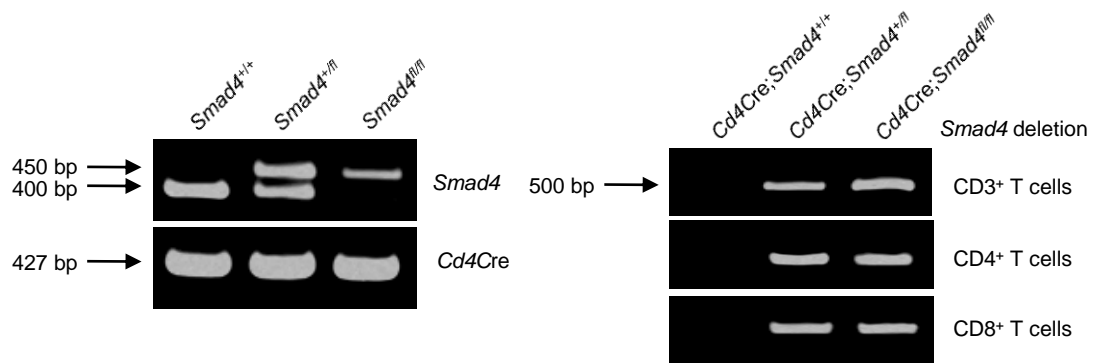

**Supporting Information Figure 14. T cell-specific *Smad4* deletion.** Genomic DNA was obtained from CD3<sup>+</sup> T cells, CD4<sup>+</sup> T cells, and CD8<sup>+</sup> T cells sorted by MACS from the spleens and superficial LNs of *Cd4Cre;Smad4*<sup>+/+</sup>, *Cd4Cre;Smad4*<sup>+/-</sup>, and *Cd4Cre;Smad4*<sup>-/-</sup> mice. Deletion of the *Smad4* gene was confirmed by PCR by the primers reported in the references (Kim et al, 2006; Lee et al, 2001; Yang et al, 1999).

Supporting Information Figure 15

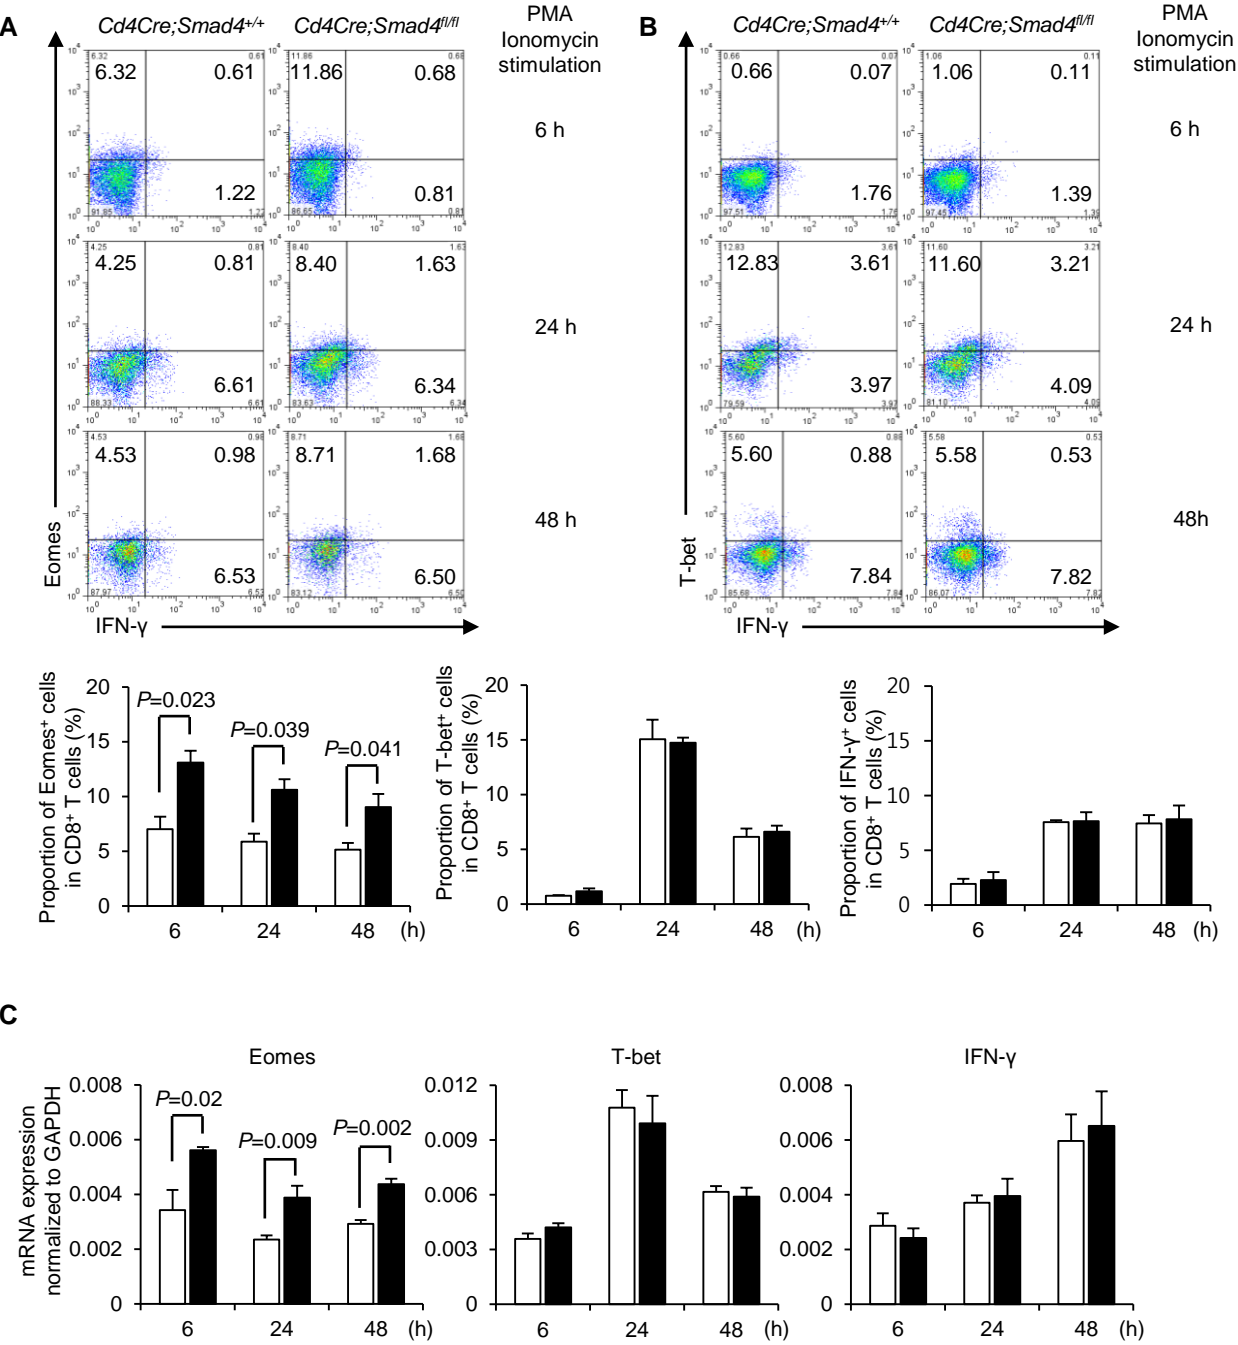

**Supporting Information Figure 15. Effect of Smad4 on PMA/ionomycin-stimulated CD8<sup>+</sup> T cells.** CD8<sup>+</sup> cells from the indicated mice were stimulated with PMA and ionomycin for 3 days. **A**, **B**. Representative dot plots show Eomes/IFN- $\gamma$ , T-bet/IFN- $\gamma$  in CD8<sup>+</sup> cells from *Cd4Cre;Smad4<sup>+/+</sup>*/*Cd4Cre;Smad4<sup>fl/fl</sup>* mice ( $n = 2/\text{genotype}$ ). **C**. qPCR analyses for Eomes, T-bet, and IFN- $\gamma$  mRNA levels in CD8<sup>+</sup> cells from *Cd4Cre;Smad4<sup>+/+</sup>*/*Cd4Cre;Smad4<sup>fl/fl</sup>* mice ( $n = 2/\text{genotype}$ ).
